# Supplementary material for: Crucial role for T cell-intrinsic IL-18R-MyD88 signaling in cognate immune response to intracellular parasite infection
Source: eLife. 2017 Sep 12;6:e30883. doi: 10.7554/eLife.30883 (PMC5629024; doi:10.7554/eLife.30883)
Supplement: Figure 3—source data 1. [file elife-30883-fig3-data1.xlsx]

## Sheet: DEGs
Figure 3 - Source Data 1 (Table 1):
Differential expressed genes between WT and Myd88-/- CD4+ T cells sorted from
infected BM-mixed chimeras
ProbeID	TargetID	WT1	WT2	MyD88KO1	MyD88KO2
770053	LOC100044756	-0.855514	-0.876463	0.861679	0.870298
5270056	SFTPD	-0.845252	-0.886543	0.861933	0.869863
5340202	CNGA2	-0.846257	-0.885527	0.874618	0.857167
3840743	ARFGAP2	-0.837574	-0.893905	0.851661	0.879818
5220739	CD200R2	-0.851589	-0.879861	0.836717	0.894733
3060398	TRPC4	-0.849192	-0.882217	0.836743	0.894666
5390437	ANKRD34A	-0.89852	-0.832887	0.859493	0.871914
3520689	9030612M13RIK	-0.851498	-0.879818	0.832914	0.898402
3780307	ARAP1	-0.86824	-0.862952	0.904067	0.827126
7100333	NLRP9B	-0.837438	-0.893234	0.825227	0.905445
7550689	SYT7	-0.8993	-0.831365	0.83004	0.900625
7000215	KCNE2	-0.843607	-0.886945	0.81917	0.911381
5720441	CXCL11	-0.919058	-0.811289	0.87193	0.858418
6330373	DLX2	-0.893673	-0.836674	0.818937	0.91141
4120224	RPS4X	-0.812696	-0.917546	0.845548	0.884694
3420154	SMARCA2	-0.823799	-0.906417	0.826756	0.903459
6650730	LCE1A1	-0.824633	-0.905474	0.906668	0.823438
4200605	ATP1B1	-0.869955	-0.8598	0.927708	0.802047
3180674	HMGA1	-0.876114	-0.853577	0.801926	0.927764
7380390	KLRB1B	-0.897632	-0.832034	0.920084	0.809582
5810471	STK36	-0.843992	-0.885371	0.929673	0.799689
3130450	ADAMTS16	-0.820967	-0.908242	0.809708	0.919501
4390138	ZDHHC23	-0.928451	-0.800642	0.832381	0.896712
6220750	TOE1	-0.937158	-0.791658	0.881888	0.846928
5260632	OLFR198	-0.789412	-0.939382	0.860891	0.867903
780376	MANBA	-0.921793	-0.80699	0.815811	0.912972
1410204	CCNG1	-0.894519	-0.834218	0.933834	0.794903
2070431	L3MBTL	-0.888178	-0.84053	0.792121	0.936586
1660504	IL7R	-0.920485	-0.808199	0.812645	0.916039
360673	MCAT	-0.877653	-0.85092	0.787874	0.940699
3990474	IL10RA	-0.940559	-0.787976	0.880497	0.848037
6550243	PCSK1	-0.790213	-0.938146	0.833905	0.894454
1820706	SCN2B	-0.943814	-0.784541	0.871407	0.856948
6620209	RAD52	-0.913048	-0.815174	0.929155	0.799067
4610086	AA536749	-0.805428	-0.922766	0.92093	0.807265
5340291	NEU3	-0.891827	-0.836368	0.787265	0.94093
5900747	ECHDC1	-0.936406	-0.791711	0.824418	0.903699
3140326	MDN1	-0.781741	-0.946328	0.874855	0.853213
6900731	0610012A05RIK	-0.947612	-0.780383	0.858893	0.869102
6650561	FUSIP1	-0.78868	-0.93921	0.903103	0.824787
1690358	GLYAT	-0.824348	-0.903487	0.939593	0.788243
3440431	U2AF2	-0.952517	-0.774978	0.863896	0.863599
5130349	ATXN10	-0.786947	-0.940538	0.908453	0.819032
4610670	NKX2-4	-0.886372	-0.840928	0.775894	0.951406
650446	PSMD11	-0.856589	-0.870698	0.95414	0.773147
3610390	TXNL6	-0.843059	-0.883822	0.955769	0.771113
6620600	NPHS2	-0.82671	-0.899971	0.774213	0.952469
6520370	PHF7	-0.810017	-0.916504	0.945281	0.781241
380500	B3GALNT1	-0.771598	-0.954878	0.898491	0.827984
3870347	SRPK2	-0.825049	-0.901158	0.956144	0.770063
7100167	DEFB41	-0.780567	-0.945527	0.803911	0.922183
3170767	CNDP2	-0.761188	-0.964864	0.864353	0.861699
6650376	TCFAP2A	-0.863284	-0.862627	0.759924	0.965987
4780176	PCDHB13	-0.758308	-0.967419	0.864113	0.861614
620538	TMEM186	-0.808622	-0.916852	0.77086	0.954614
2710736	ALX4	-0.82467	-0.900793	0.962435	0.763027
6220646	AI317395	-0.811286	-0.914132	0.956631	0.768788
2680639	BTG1	-0.770827	-0.954551	0.918341	0.807037
3710156	FGD5	-0.809519	-0.915764	0.768424	0.956859
1400167	BC050811	-0.970185	-0.755082	0.875288	0.849978
3610039	PCSK1N	-0.754634	-0.97047	0.843518	0.881585
6200079	KLHL32	-0.820529	-0.904512	0.964273	0.760768
520189	ZC3H7A	-0.9609	-0.763989	0.810631	0.914258
2140364	PRODH2	-0.798601	-0.92628	0.953637	0.771244
780600	2400003C14RIK	-0.759549	-0.964873	0.810782	0.91364
6840288	KCNJ6	-0.875555	-0.848837	0.976465	0.747928
4390382	ATP2B4	-0.745291	-0.978842	0.855268	0.868865
7400132	GIT2	-0.776155	-0.947965	0.782523	0.941597
5490437	CCDC27	-0.743741	-0.980134	0.849435	0.87444
7570762	EG668668	-0.85928	-0.864427	0.741803	0.981903
4280674	MCART6	-0.963067	-0.760586	0.927107	0.796545
2900072	HTR1F	-0.779297	-0.944285	0.950262	0.77332
7100326	SMAD5	-0.785333	-0.938152	0.767078	0.956407
4070626	POLB	-0.817486	-0.905677	0.745778	0.977385
520446	RCHY1	-0.988457	-0.734228	0.865883	0.856802
830601	OVOL2	-0.741648	-0.980814	0.9088	0.813662
7040471	CLIC6	-0.87926	-0.843194	0.73375	0.988704
5130373	CLM3	-0.89342	-0.828877	0.986867	0.73543
4830594	DNAJC5G	-0.979978	-0.742299	0.808613	0.913664
5290553	CKT2	-0.767239	-0.955026	0.771217	0.951049
5050167	DPH3	-0.732008	-0.989981	0.83381	0.888179
5080301	REV3L	-0.802822	-0.91882	0.981691	0.739952
270520	ABPE	-0.728486	-0.992462	0.902295	0.818653
2190753	SULT5A1	-0.77134	-0.949216	0.969518	0.751038
1190563	PSORS1C2	-0.842221	-0.878227	0.719847	1.0006
6980243	VPS16	-0.897504	-0.822842	0.997329	0.723016
3120491	VPS16	-1.00319	-0.716843	0.844178	0.875851
3060494	POU4F2	-0.996903	-0.723044	0.906241	0.813707
10753	EHD3	-0.987597	-0.732133	0.930218	0.789512
7560291	JUN	-0.769033	-0.95063	0.745228	0.974436
2940156	DDX6	-0.836369	-0.883221	1.00456	0.715027
730291	CSF3R	-0.7751	-0.944093	0.982264	0.736929
2470717	AQP8	-0.995712	-0.723442	0.92058	0.798574
670243	5730470L24RIK	-0.824391	-0.894741	0.714465	1.00467
4060053	1700108M19RIK	-1.00865	-0.710326	0.841949	0.877029
5420615	RAD51L3	-0.708706	-1.01017	0.855892	0.862984
5340288	SCCPDH	-0.713008	-1.00582	0.89665	0.822175
5260736	ZFP217	-0.826168	-0.892374	0.710239	1.0083
6940114	2810453I06RIK	-0.739075	-0.979394	0.954073	0.764396
4640360	FMR1NB	-0.969109	-0.749205	0.751408	0.966905
5390082	HMG20A	-0.986499	-0.731743	0.946281	0.771961
2490181	V1RC24	-0.754818	-0.963294	0.973859	0.744253
6860670	OLFR362	-0.971929	-0.745875	0.967534	0.750269
2760102	SPEER2	-0.980051	-0.737701	0.758975	0.958777
2970184	PHF12	-0.85336	-0.86422	1.01668	0.700897
5690112	OLFR483	-0.741143	-0.975729	0.746999	0.969873
4230047	KLRA16	-0.698903	-1.01788	0.828564	0.88822
4040524	CXCL4	-0.971724	-0.744995	0.974923	0.741796
6660735	D930036B08RIK	-0.769629	-0.946992	0.995208	0.721413
2750382	PRSS29	-0.941357	-0.775242	0.717781	0.998818
2630215	BFAR	-0.849682	-0.86682	0.694736	1.02177
2350091	NEU1	-0.890671	-0.825635	0.69663	1.01968
3940711	IQCC	-0.694594	-1.02167	0.836423	0.879842
1780408	SKIL	-1.01484	-0.70141	0.806268	0.909979
7000377	OLFR1365	-0.805282	-0.91074	1.01566	0.700361
5570129	RPS15	-0.790566	-0.92544	0.705971	1.01003
6760050	EPHA3	-0.82185	-0.894135	1.02045	0.695538
2650102	OLFR118	-0.731865	-0.984114	0.74936	0.966619
4780519	TRPV5	-0.910819	-0.805126	1.01601	0.699939
4200270	ZFX	-0.70535	-1.01029	0.928806	0.786835
5220347	RARS2	-0.855344	-0.860238	1.02626	0.689317
4250431	LOC545013	-0.793122	-0.922455	1.0134	0.702174
2510707	RPL38	-0.883451	-0.832094	0.691057	1.02449
7050577	CLK4	-0.83693	-0.878588	1.02529	0.69023
3610465	VKORC1	-0.771141	-0.944268	1.00328	0.712125
6270482	0610025P10RIK	-1.02726	-0.688099	0.861147	0.854213
1410706	GALC	-0.906714	-0.808497	0.694466	1.02074
2470301	TMEM62	-0.920882	-0.793983	0.697455	1.01741
4210309	MBOAT2	-0.920498	-0.794145	0.696051	1.01859
270278	IFT172	-0.699306	-1.01524	0.785034	0.929509
3370484	PRSS2	-0.977178	-0.73734	0.983092	0.731426
6200064	RNF167	-0.822574	-0.891834	1.02809	0.686314
5130148	SPARC	-0.880264	-0.833922	1.03101	0.683178
2490288	LOC100047935	-0.788435	-0.925606	1.01928	0.694761
2680082	PSMA6	-0.747465	-0.966573	0.719049	0.994989
50168	ARHGAP8	-0.825378	-0.888605	1.03057	0.683411
5080487	DDX27	-0.780898	-0.932806	1.0176	0.696103
7000437	TUSC1	-0.71833	-0.995334	0.96861	0.745055
7100546	PCX	-0.681934	-1.03173	0.889836	0.823828
3990450	GPRC5C	-0.788751	-0.92486	0.692071	1.02154
4590615	CCDC9	-0.71309	-1.00025	0.96446	0.748879
4890537	NPFFR2	-0.91369	-0.799601	1.02712	0.686166
7150433	BTG3	-0.765326	-0.947651	1.01315	0.699823
4040224	USP3	-1.00216	-0.710268	0.96798	0.74445
4390047	EIF4EBP2	-0.80075	-0.91142	0.679523	1.03265
5360360	NFASC	-0.819938	-0.892173	1.0378	0.674307
3780066	2410018C20RIK	-0.870165	-0.841837	0.670735	1.04127
3450463	KCTD12B	-0.993361	-0.718541	0.981707	0.730195
3850634	OLFR503	-0.822722	-0.889045	0.671964	1.0398
7050189	EG210155	-0.949959	-0.761568	1.01844	0.693083
5570253	B2M	-0.731834	-0.979656	0.997335	0.714154
540563	RAE1	-0.667337	-1.04409	0.860502	0.850925
70767	GPR6	-1.04297	-0.668408	0.878392	0.832988
2750059	COX7A2	-0.802053	-0.908676	0.671349	1.03938
3930114	HIGD1B	-0.678526	-1.0321	0.93028	0.780349
1230204	CBARA1	-1.01052	-0.699955	0.969346	0.741132
4390121	CCDC93	-0.92261	-0.787771	1.03617	0.67421
270274	POLR1A	-0.905097	-0.80503	0.667368	1.04276
5690246	GBP1	-0.940993	-0.769073	1.02952	0.680543
6900088	L3MBTL3	-1.03976	-0.670133	0.917995	0.791899
4010400	PSG27	-0.882118	-0.827761	1.04838	0.661503
1030682	SLC11A2	-0.851116	-0.8586	0.658841	1.05087
4590370	NOVA2	-0.723401	-0.986188	1.00104	0.708548
6510398	SLC5A4A	-0.819546	-0.889974	1.04849	0.661031
2690475	RHOBTB2	-1.04835	-0.661005	0.815471	0.893887
7150360	2610019A05RIK	-0.702508	-1.00683	0.728491	0.980851
7570544	CTR9	-0.944062	-0.765203	0.677972	1.03129
6520193	DNASE1L3	-0.936329	-0.772552	1.03653	0.672348
7550102	ADPRHL2	-0.808031	-0.900734	1.04909	0.65967
2340521	RCBTB2	-0.735668	-0.972887	0.691946	1.01661
7050438	TBX15	-1.01597	-0.692305	0.975402	0.732875
4210019	ZFP324	-0.724487	-0.983598	0.697715	1.01037
2750189	NAMPT	-0.653271	-1.05481	0.884422	0.823658
4060121	MAGEA9	-0.804216	-0.90382	0.656976	1.05106
1010487	RSRC1	-0.692239	-1.01567	0.730004	0.977909
4200019	ZFP825	-0.667828	-1.03993	0.769229	0.93853
1070630	TNFAIP2	-1.05731	-0.650415	0.875034	0.83269
2690500	LOC233529	-0.965393	-0.742237	0.681918	1.02571
4150440	FBXL12	-0.653521	-1.05372	0.904875	0.802365
5720278	VDAC3	-0.824866	-0.882364	1.05821	0.649024
4210612	4930535E21RIK	-1.05683	-0.65035	0.891719	0.815466
4760131	RBBP7	-1.03324	-0.673901	0.956334	0.750803
7150114	FSHB	-0.665875	-1.04113	0.764874	0.942135
5090632	MOSPD3	-0.65648	-1.05035	0.921061	0.785772
5960243	TANK	-1.04254	-0.664123	0.764671	0.941987
5570437	OLFR177	-0.872272	-0.834362	0.645132	1.0615
4610458	FTSJ2	-0.695556	-1.01107	0.716133	0.990497
4730291	ANKRD54	-0.895964	-0.810378	1.059	0.647337
610113	DGCR2	-0.778051	-0.928017	0.65544	1.05063
3520743	HCRTR2	-0.893018	-0.812998	0.645276	1.06074
2490367	2410002F23RIK	-0.778081	-0.92781	0.654543	1.05135
6980528	RECQL	-0.683366	-1.02247	0.980638	0.725198
3940494	FAM168B	-0.68019	-1.02563	0.976436	0.729382
4640021	GM648	-1.04876	-0.656958	0.935842	0.769876
7150377	CD83	-0.720158	-0.985498	1.01946	0.686192
2650477	ACCN3	-0.891036	-0.814532	1.06268	0.642892
290097	LRG1	-1.06112	-0.644216	0.802954	0.902377
1190386	TTC12	-0.788421	-0.916863	0.647996	1.05729
4290053	OLFR1126	-1.03028	-0.674974	0.97305	0.732199
1090348	6330408A02RIK	-0.660196	-1.04504	0.75748	0.94776
2570328	ASB4	-0.923069	-0.782088	0.649478	1.05568
4040475	PRKG2	-0.641942	-1.06306	0.898884	0.806116
1050241	TDGF1	-0.739609	-0.965357	1.03634	0.668621
4480228	NOMO1	-0.807058	-0.897765	0.640913	1.06391
6110008	BCL11B	-0.684785	-1.01996	0.989611	0.715135
5490204	TRA2A	-0.706017	-0.998561	0.691629	1.01295
110154	RCOR1	-0.837817	-0.866701	0.635231	1.06929
4490189	B3GNT5	-1.05501	-0.649505	0.931067	0.773446
5260730	ARF4	-1.04201	-0.662427	0.745359	0.959081
510243	B230339M05RIK	-0.915277	-0.78914	1.06078	0.643633
7210072	IRF6	-0.907562	-0.796729	0.6409	1.06339
2230204	MSRA	-1.04088	-0.663212	0.963306	0.740786
4490154	NDUFS4	-0.632662	-1.07138	0.850956	0.853086
6200161	UGT2A2	-0.715355	-0.988667	1.02371	0.680314
2490370	ASB3	-0.853052	-0.85085	1.07185	0.632049
1440196	RFESD	-0.730866	-0.972956	1.03588	0.667944
2710411	PNPT1	-0.715424	-0.988324	0.678661	1.02509
3360220	PELI1	-0.688794	-1.01494	1.00039	0.703337
3890609	LPIN1	-0.67251	-1.03101	0.721873	0.981651
1400343	SNX19	-0.913515	-0.789859	0.638528	1.06485
3290008	SH3RF1	-0.644996	-1.05837	0.932664	0.7707
4200709	PIPOX	-0.9367	-0.766628	1.05686	0.646469
2970278	TRIM41	-0.891016	-0.812255	0.632817	1.07045
7330440	PPP1R13B	-0.892621	-0.809987	0.630267	1.07234
6770259	LOC435565	-0.660996	-1.04154	0.730936	0.971601
6420520	FOSB	-1.03027	-0.672213	0.988109	0.714369
4850538	HTR4	-0.912258	-0.790205	1.06823	0.634236
1240504	LOC100044221	-0.668387	-1.03407	0.983087	0.719371
5490161	TLE4	-0.651085	-1.05137	0.954983	0.747473
2070035	PDCD1LG2	-1.01268	-0.689255	1.01081	0.691128
160563	LONRF1	-0.995957	-0.705883	1.02652	0.675323
6590541	SDC1	-0.631466	-1.07034	0.789461	0.912345
1190274	PHF1	-1.07572	-0.625845	0.892503	0.809063
4050541	RNF125	-0.894967	-0.806549	0.626106	1.07541
5560136	4930547C10RIK	-0.67204	-1.02943	0.707339	0.994134
7320632	CCDC155	-1.0684	-0.632953	0.923456	0.777896
5050181	MYOZ2	-1.00159	-0.699661	0.677209	1.02405
3120368	OLFR1443	-0.715446	-0.985748	1.03688	0.66431
1090056	HTR2B	-0.695865	-1.00522	1.02152	0.679568
1300435	CFC1	-0.802431	-0.898488	1.07658	0.624335
5310292	CNNM3	-0.683546	-1.01698	0.688044	1.01248
4670370	MTMR11	-0.682054	-1.0184	0.68913	1.01132
3890601	METT5D1	-0.910145	-0.790153	1.07575	0.624552
3930025	1700061G19RIK	-0.623591	-1.07667	0.793215	0.907044
5130228	POPDC3	-0.880049	-0.819736	1.08325	0.616538
6840280	SPEER2	-1.08556	-0.614104	0.852877	0.846784
1580356	FOXM1	-0.757172	-0.942322	0.632283	1.06721
240154	POGZ	-0.67911	-1.02038	1.01331	0.68618
3180241	TNFSF14	-0.615771	-1.08369	0.884179	0.815278
160626	LOC380691	-0.938969	-0.760469	1.06878	0.630654
5340370	PBRM1	-0.98647	-0.712795	0.65592	1.04334
7000086	IFNAR2	-0.629961	-1.06902	0.941886	0.757096
5340292	NUDT4	-0.699377	-0.999555	1.03464	0.664295
2340241	ST6GALNAC4	-1.0878	-0.611023	0.836091	0.862728
6380095	ADK	-0.625406	-1.07339	0.766544	0.932257
6450121	EG432723	-1.06462	-0.634141	0.745553	0.953207
1240040	WIPF2	-0.886787	-0.811972	1.08541	0.61335
5550079	HMX3	-1.04887	-0.649842	0.717492	0.981217
1500100	OLFR1394	-1.08819	-0.610454	0.865026	0.833618
1050551	EDA	-1.08888	-0.609662	0.841287	0.857256
4640553	MRPL12	-1.04513	-0.653308	0.710385	0.988052
6590278	EG623661	-0.876719	-0.821558	0.610046	1.08823
770398	CORO1B	-1.03397	-0.664112	0.693961	1.00413
7560450	FAF1	-0.689651	-1.00832	1.03081	0.667158
6620133	LOC100046039	-0.749778	-0.948185	0.628484	1.06948
1990026	ARL9	-0.752926	-0.945028	0.627056	1.0709
4280687	OLFR356	-1.09075	-0.607161	0.857638	0.840278
4250673	OLFR352	-0.606505	-1.09128	0.852142	0.845644
5570605	OLFR1329	-0.672508	-1.02527	1.01521	0.682567
5130672	ANKRD17	-0.731438	-0.96632	0.636708	1.06105
150554	COL4A6	-0.948075	-0.749472	1.07082	0.626722
2350554	RDBP	-0.684685	-1.01281	0.668917	1.02858
4730360	RPGRIP1	-1.07783	-0.619605	0.931555	0.765881
3940224	FBXO7	-1.06131	-0.635947	0.728541	0.968718
4280156	THUMPD1	-0.94495	-0.751913	0.62257	1.07429
580634	OLFR545	-0.604251	-1.09254	0.819278	0.877511
4290523	CCL20	-0.777845	-0.918893	0.612644	1.08409
510372	SIDT2	-1.05542	-0.640814	0.983824	0.712413
10682	MOBKL2C	-0.613808	-1.08202	0.933168	0.762665
5130162	DST	-1.09092	-0.604902	0.792697	0.903121
770044	OLFR342	-0.641548	-1.05418	0.988153	0.707579
2570026	ZFP82	-0.882562	-0.813001	1.09542	0.600147
3120519	NCAM1	-0.812223	-0.883036	0.599042	1.09622
5690136	D630014A15RIK	-0.684859	-1.0103	0.655927	1.03924
3520612	THUMPD3	-0.715472	-0.979156	0.63113	1.0635
2750333	NECAP2	-0.607066	-1.08754	0.927507	0.767103
6110021	CLCC1	-0.685818	-1.00851	0.650685	1.04364
7330333	CYFIP2	-0.885028	-0.80917	0.595289	1.09891
3310685	CLOCK	-1.10237	-0.591574	0.840584	0.853364
290187	NLRP4C	-0.610962	-1.08291	0.945508	0.748363
5130523	B230399E16RIK	-1.07379	-0.620068	0.965073	0.728784
3870709	OTUD7B	-0.898289	-0.795521	1.09763	0.596178
5960497	TGFBR2	-0.867666	-0.82606	0.591496	1.10223
3360463	CYPT10	-0.59221	-1.10145	0.816514	0.87715
2690601	ZFP628	-0.590587	-1.10304	0.859479	0.834149
6220672	KTN1	-1.04272	-0.650896	1.0125	0.681116
1300673	CLECSF12	-0.989518	-0.703985	1.06039	0.633112
5690553	CSPG4	-0.657534	-1.03588	0.672357	1.02105
1260192	EIF2B1	-0.707071	-0.986299	0.630451	1.06292
5560131	4831426I19RIK	-0.598435	-1.0949	0.915152	0.778183
3290286	OLFR49	-0.716133	-0.976848	1.06991	0.623074
1050424	5930416I19RIK	-0.589852	-1.103	0.810529	0.882326
2340066	VARS2	-0.625415	-1.06722	0.709554	0.983077
2710170	SETD8	-0.59525	-1.0973	0.914278	0.778272
4920538	DUSP13	-0.990343	-0.702075	1.0632	0.629218
1980500	OLFR113	-1.0199	-0.672484	1.04048	0.651906
5670725	OLFR1034	-0.587599	-1.10478	0.878702	0.813678
5860162	4930415G15RIK	-0.585004	-1.10669	0.813402	0.878289
270523	SPARCL1	-0.866133	-0.825446	0.583363	1.10822
1110075	E130309D14RIK	-0.728061	-0.963457	1.08141	0.61011
5570041	HOMER1	-0.627593	-1.0639	0.993497	0.697998
6420296	POLR3B	-1.0463	-0.645183	0.674816	1.01667
3610689	CNPY3	-0.825513	-0.86596	0.582964	1.10851
3400091	FBXO36	-1.10337	-0.5881	0.901254	0.790219
7330189	ADCY7	-0.582993	-1.10826	0.874847	0.816406
510433	TERF2IP	-0.644625	-1.04658	1.01741	0.6738
60154	OLFR979	-1.09725	-0.593952	0.926823	0.764375
5270619	ARSI	-1.02615	-0.664978	0.652068	1.03906
4610066	1110020G09RIK	-0.59984	-1.09089	0.743219	0.947511
4640717	LOC669660	-0.923993	-0.766448	1.10017	0.59027
4290678	SNX15	-0.916706	-0.77332	0.586623	1.1034
3190468	CAMK2D	-0.605956	-1.08394	0.967479	0.722414
1190139	RGS17	-0.627622	-1.06166	1.00607	0.683216
5080747	TNFSF18	-0.741171	-0.948076	1.09466	0.594582
1740148	UGT1A2	-0.888826	-0.799902	1.11292	0.575809
3290541	SMCR7L	-0.726159	-0.962256	1.09057	0.597849
770148	EPHA4	-1.0819	-0.60639	0.979494	0.708792
5270768	ELAVL2	-0.72678	-0.961298	0.596154	1.09192
4760646	COMMD4	-0.796201	-0.891818	0.573804	1.11421
5340255	AB041550	-0.766843	-0.920464	1.10936	0.57795
5390255	ADAP2	-0.720191	-0.967076	0.595993	1.09127
6420189	DDI2	-0.568843	-1.11828	0.807044	0.880081
830598	CBX7	-1.02351	-0.663185	0.631025	1.05567
4050196	MTRR	-0.647277	-1.03925	0.644749	1.04178
4830379	IPO7	-0.725312	-0.961121	0.590095	1.09634
6400070	P2RY10	-0.824668	-0.86175	1.12187	0.564544
6580301	RAB3GAP1	-0.616435	-1.06994	0.67991	1.00646
6840301	SLC37A1	-1.03487	-0.651466	0.639757	1.04658
4810551	ATG10	-1.00391	-0.682407	0.614389	1.07192
5390438	TRIM25	-0.562804	-1.12329	0.839333	0.846758
20113	KNG2	-0.569019	-1.11702	0.902688	0.783351
7050440	ST5	-0.999293	-0.686509	1.07652	0.609284
7150097	IRS3	-1.04407	-0.641572	0.645829	1.03981
870707	BCL6	-0.586133	-1.09945	0.726494	0.959092
3170682	RAB11FIP4	-0.911039	-0.774376	1.1166	0.568811
3890332	GADD45A	-0.661834	-1.02353	1.05962	0.625751
4040307	BC020108	-0.837167	-0.848117	0.560014	1.12527
1710189	OLFR800	-0.774426	-0.910807	0.568128	1.11711
2970086	RNASET2	-0.880333	-0.804839	0.5621	1.12307
270091	EPB4.1L3	-0.663065	-1.02209	0.623723	1.06143
4900411	2400006N03RIK	-0.604929	-1.0801	0.997066	0.687966
6060154	KLHDC4	-0.567909	-1.11666	0.76592	0.918649
1410671	OLFR1042	-0.597038	-1.08709	0.694328	0.989797
240730	CBLN3	-0.880332	-0.803667	0.558092	1.12591
6350255	MAL2	-0.921592	-0.762333	1.11739	0.566538
2710397	ZFP454	-0.785909	-0.897994	0.560714	1.12319
5490717	PRG3	-0.555857	-1.12798	0.864702	0.819133
290044	GAMT	-0.890886	-0.792948	1.12468	0.559156
6250672	PFKM	-0.914305	-0.769492	1.11969	0.564102
4850181	PSMA3	-0.794894	-0.888659	0.557829	1.12572
1190373	AICDA	-0.809532	-0.874011	0.555761	1.12778
160554	D3ERTD751E	-0.990134	-0.693407	1.08841	0.595126
6770360	ALDH5A1	-1.12361	-0.559903	0.783042	0.900473
3870537	IL17RD	-1.03013	-0.653338	0.623865	1.05961
4640692	SFI1	-0.600846	-1.08261	0.683729	0.999727
6940537	DNAJC6	-0.666346	-1.01703	0.612808	1.07056
10224	ORF19	-0.895265	-0.788035	0.558145	1.12516
5270338	ATP2B3	-0.694634	-0.988634	0.593249	1.09002
2680523	RPRML	-0.5939	-1.08914	0.691978	0.991067
3390228	RBM28	-0.698095	-0.984819	0.589767	1.09315
2000270	SPC25	-0.620751	-1.06213	0.653692	1.02919
4260332	DERL1	-1.00236	-0.680338	0.599818	1.08288
5960152	BXDC2	-0.723847	-0.958792	1.10696	0.575683
6770292	OLFR866	-0.935301	-0.747292	0.566335	1.11626
7100682	FAM101A	-1.08097	-0.601284	1.00689	0.675366
1090639	DHRS7B	-0.674054	-1.00807	1.08051	0.601612
7040446	GFI1	-0.869022	-0.812927	0.549879	1.13207
3130072	ZBTB9	-0.643542	-1.0384	0.625216	1.05673
3520551	4933440H19RIK	-1.07405	-0.60787	1.01769	0.664229
6420369	TLN2	-0.835223	-0.846671	0.5484	1.13349
2140154	OLFR570	-0.601081	-1.08068	1.00921	0.672553
2120301	OLFR723	-0.990095	-0.691595	0.588488	1.0932
3890687	ZFP313	-0.902587	-0.778979	0.553819	1.12775
1410014	SHQ1	-1.11953	-0.561756	0.746555	0.934735
1010739	ACVR1C	-1.11699	-0.564216	0.942533	0.73867
4480437	CYP2C37	-0.870435	-0.810665	1.13391	0.547195
1690086	ZBP1	-0.824285	-0.856713	1.13522	0.545781
7050128	MRPS22	-0.576402	-1.1044	0.973666	0.707135
6420722	NME3	-0.897285	-0.783296	1.13111	0.549472
5560338	ABO	-0.543799	-1.13651	0.818758	0.861549
20670	ZFAND6	-0.860108	-0.820126	1.13678	0.543456
2510474	BC018465	-1.13094	-0.548926	0.905876	0.773985
6980241	D730048I06RIK	-0.69181	-0.988034	1.09901	0.580837
3850603	TRIP4	-0.958195	-0.721627	0.565856	1.11397
4810341	FAM149B	-1.08465	-0.595124	0.668771	1.011
6900189	IAP	-1.13443	-0.545178	0.788208	0.891396
3610553	RNF145	-0.918663	-0.760809	0.550846	1.12863
3180630	SWAP70	-0.683679	-0.995421	1.09649	0.582614
2680040	BSDC1	-0.915183	-0.763902	1.13043	0.548655
1070156	AI662250	-1.13902	-0.539987	0.867138	0.811866
2190400	PFDN5	-0.947664	-0.731261	1.12035	0.558576
10546	BRP44	-0.551491	-1.1273	0.750276	0.928515
1980113	2310047M10RIK	-0.58537	-1.09338	1.0018	0.676952
4610131	RANBP3L	-1.14043	-0.538295	0.856661	0.822065
2850523	SERF1	-0.541444	-1.13714	0.789725	0.888862
4290377	EFCAB2	-0.961243	-0.717327	1.11556	0.56301
3060022	TMEM25	-1.08946	-0.588956	0.669399	1.00902
240091	SSXB3	-0.981772	-0.696579	1.10608	0.572275
2850661	OLFR1160	-0.545408	-1.13281	0.913493	0.764724
6860465	KSR1	-0.575372	-1.10247	0.687394	0.99045
5720328	NRIP1	-1.06202	-0.615782	1.04557	0.632231
3710671	SCOC	-1.11558	-0.562059	0.965981	0.711657
6270634	9830002I17RIK	-0.704752	-0.972833	0.565136	1.11245
1340537	2610209A20RIK	-1.03996	-0.637534	1.06791	0.609592
6960025	VWA1	-1.1438	-0.533655	0.840001	0.837454
4180411	IFT140	-0.556852	-1.12054	0.95589	0.721506
5290484	4930430E16RIK	-0.83705	-0.840325	0.533395	1.14398
6200315	TBC1D10B	-1.14381	-0.533421	0.821259	0.855974
7160626	IL1RL1L	-0.600535	-1.07635	1.03191	0.644979
4760471	KHDRBS1	-0.661749	-1.01512	0.58777	1.0891
4070681	AHRR	-0.815511	-0.861147	0.531915	1.14474
3290184	SCGB3A1	-0.660852	-1.0153	1.09075	0.585411
6480403	MBTPS2	-0.995328	-0.680793	1.10372	0.572398
6760669	MAFK	-0.58619	-1.08991	1.0167	0.659393
7210543	STK22S1	-0.547849	-1.12821	0.732183	0.943879
1110088	APOBEC1	-0.734547	-0.941225	1.1298	0.54597
2760095	DDX17	-0.528171	-1.14743	0.855282	0.820322
4670458	JAK1	-0.548851	-1.12656	0.723404	0.952006
2140164	PARK2	-0.726423	-0.948933	1.12787	0.547485
4250563	DLG2	-0.593468	-1.08181	1.03027	0.645001
6020288	FBXO9	-0.79778	-0.8774	1.1463	0.52888
3890400	1700034I23RIK	-1.10823	-0.566948	0.991377	0.683797
50279	HBS1L	-0.9136	-0.761558	0.535676	1.13948
5700064	MYB	-0.964097	-0.711039	0.553052	1.12208
2710746	POLG	-0.617935	-1.05719	1.05832	0.616808
4210039	CMA1	-0.55265	-1.1222	0.965229	0.709625
5090594	3110049J23RIK	-0.711951	-0.962685	1.12381	0.550821
3460368	FAM168A	-0.984523	-0.690108	1.11324	0.561389
2680398	KCNQ2	-0.558032	-1.11656	0.696267	0.978322
630431	MS4A4D	-0.953462	-0.721125	1.12778	0.546806
7040086	FN3K	-0.597633	-1.07681	1.03899	0.635458
2350546	HIPK4	-0.570098	-1.10418	0.67257	1.00171
4880551	INTS3	-0.923604	-0.750641	1.13874	0.535506
2850687	OLFR963	-1.09617	-0.578027	0.659829	1.01436
4810204	CD27	-0.953141	-0.720956	1.12898	0.545119
2470132	LOC668492	-1.13817	-0.535914	0.747417	0.926672
3360093	ZFP451	-1.00784	-0.666169	0.57308	1.10093
1030132	VMN2R42	-0.879488	-0.794393	1.14879	0.52509
3610475	PAK4	-0.607288	-1.06647	0.62109	1.05266
3060131	ADRA2C	-0.991996	-0.681627	0.562201	1.11142
5670170	FJX1	-0.55375	-1.11967	0.977283	0.69614
6900095	MYO15	-0.914347	-0.758773	1.14362	0.529505
6350427	SUV420H1	-1.04252	-0.630486	0.595518	1.07749
6620692	HDGFRP2	-1.1041	-0.568763	1.00709	0.665774
6100255	FAAH	-0.945558	-0.727187	1.13477	0.537978
4040196	CD33	-0.546852	-1.12587	0.967423	0.705303
4890204	OLFR12	-0.596792	-1.07589	1.04533	0.627359
1190110	HEATR5A	-0.920925	-0.751655	0.529572	1.14301
6450241	SYTL3	-0.525866	-1.14665	0.765487	0.907026
6330278	DRG2	-0.889866	-0.782626	0.522383	1.15011
3940392	PDCD5	-1.15091	-0.521568	0.885116	0.787363
3120730	EG545253	-1.05346	-0.618614	1.07017	0.601901
6130450	CDYL	-0.704289	-0.967765	0.544886	1.12717
430739	D030013I16RIK	-0.680389	-0.991457	0.556149	1.1157
3990278	OLFR781	-1.01286	-0.658557	0.567737	1.10368
4210711	WDR72	-0.636292	-1.03508	1.08766	0.583712
4640634	CAMSAP1L1	-1.11445	-0.556877	0.995696	0.675631
6370504	5031408O05RIK	-0.590468	-1.08066	1.04436	0.626769
4900561	ABPG	-0.971518	-0.699408	1.12785	0.543074
4540136	MBP	-0.591352	-1.07925	0.623067	1.04753
2260632	MYBL1	-0.860677	-0.809872	1.15775	0.512801
380332	LIPH	-1.12307	-0.547284	0.686565	0.983785
2490204	ZFP804A	-1.15934	-0.510925	0.835295	0.834968
1110138	ANKRD27	-0.584846	-1.08541	0.628996	1.04126
5130468	HSN2	-0.708775	-0.961312	1.13414	0.535946
130328	ZMYND11	-0.696291	-0.973648	0.540996	1.12894
4640341	ALK	-0.603887	-1.06602	0.606225	1.06368
4390692	AKAP10	-0.773593	-0.896244	1.15439	0.515448
5050609	RAB11FIP5	-0.530686	-1.13907	0.950748	0.719008
4260187	V1RB7	-0.94417	-0.725556	0.52817	1.14156
4760523	MAGI1	-0.835332	-0.834215	0.508727	1.16082
240615	EIF4EBP1	-0.943985	-0.725377	1.14236	0.527001
2650471	F2	-0.960885	-0.708287	1.13622	0.532956
2680050	PRM1	-1.10819	-0.560917	1.01388	0.655228
1410324	TOR1A	-0.82801	-0.840955	1.16195	0.507014
3180192	GJB1	-0.834329	-0.834402	0.506239	1.16249
1300725	NDUFB10	-0.511548	-1.15712	0.894219	0.774448
1090019	OLFR784	-1.09841	-0.570228	1.02946	0.639182
5080398	RSPRY1	-0.643933	-1.0247	0.566746	1.10188
3870647	TBC1D16	-0.799034	-0.869322	1.16138	0.506978
2510307	BET1	-0.862071	-0.80627	1.1621	0.506237
5080438	USP38	-0.613649	-1.0546	0.589456	1.07879
2810300	BC027072	-1.03644	-0.631776	1.09409	0.57412
5270452	TIAM1	-0.856437	-0.811702	0.505197	1.16294
7050136	TRIOBP	-0.940964	-0.727105	1.14603	0.522042
6580403	THRSP	-0.527815	-1.1401	0.710252	0.957665
1050114	1300001I01RIK	-1.0073	-0.660517	1.11521	0.552603
4900224	HEG1	-0.505984	-1.16183	0.874753	0.793059
2190632	SLC44A2	-1.04146	-0.626291	1.09119	0.576565
4390414	KREMEN	-1.15097	-0.516762	0.927612	0.740115
3840202	STX6	-0.974423	-0.693302	1.13318	0.534546
2000576	AASDHPPT	-0.657775	-1.00979	1.1142	0.55337
3780471	TCF7	-0.639236	-1.02815	0.56519	1.1022
6480646	PAQR8	-0.751402	-0.915969	0.512493	1.15488
4640376	ZDHHC17	-1.1558	-0.511563	0.912344	0.755021
1050209	RPL12	-0.671889	-0.995112	1.12408	0.542922
1690204	2410014A08RIK	-0.88415	-0.782741	1.16233	0.504558
6960747	TNIP1	-1.0979	-0.568935	1.03561	0.631225
2450180	MON1B	-0.662653	-1.00409	0.547298	1.11945
4010626	SLC35B3	-0.5233	-1.14329	0.71028	0.956314
6480181	ANKS6	-0.670426	-0.996169	1.12434	0.542257
240110	OLFR32	-0.64452	-1.02206	1.10829	0.558288
4200735	FKBP2	-1.14433	-0.522023	0.711472	0.954883
2940646	FABP6	-1.16707	-0.499181	0.816396	0.849857
1190670	FIS1	-0.498585	-1.1676	0.838143	0.828039
4280608	LOC100044298	-0.999071	-0.666845	1.12411	0.54181
730544	ELAC2	-1.14876	-0.517085	0.720094	0.94575
4150097	PPP1R3B	-0.529783	-1.13602	0.976681	0.68912
6040753	MTUS1	-1.02475	-0.640991	1.10825	0.557486
6510367	FAM163A	-0.511742	-1.15398	0.735031	0.930689
160278	FOXO6	-0.996775	-0.668943	0.539905	1.12581
1500735	CCDC44	-0.644816	-1.02084	0.554527	1.11113
5290086	NACA	-0.503041	-1.16254	0.89747	0.768112
4610626	FOXK1	-0.727326	-0.937919	0.512635	1.15261
6250692	AFAP1	-0.502835	-1.16241	0.901322	0.763924
5360202	A730098D12RIK	-1.14268	-0.522425	0.964934	0.700175
4900674	TBC1D17	-1.10079	-0.56425	1.03709	0.627951
6650463	GRIN2C	-1.17002	-0.49438	0.859968	0.804428
2680725	MED31	-0.579601	-1.08469	0.605675	1.05862
1660156	PNPLA8	-0.60093	-1.06336	1.08037	0.583915
830161	RIC3	-0.50689	-1.15733	0.735023	0.929194
6450594	PPM1F	-0.569815	-1.09395	1.04928	0.614481
5090025	LOC433416	-0.494378	-1.16904	0.883982	0.779434
3440463	GUCY1A3	-1.17312	-0.490147	0.81879	0.844474
6180397	ABCA6	-1.04023	-0.622915	1.10255	0.560601
7560156	PCNXL2	-1.07498	-0.588079	0.591012	1.07205
6760088	IFNGR2	-0.734827	-0.928204	0.503163	1.15987
4070204	OLFR380	-1.16803	-0.49485	0.89558	0.767305
7210674	ADD2	-0.543464	-1.11938	1.01731	0.645537
5080048	CYP2D26	-0.513423	-1.14923	0.702002	0.960653
2490731	MYL1	-0.702428	-0.960223	1.14941	0.513237
6180537	USP26	-0.623326	-1.03932	1.10435	0.558292
2340753	SUV39H2	-0.977675	-0.684909	0.520681	1.1419
5700468	ENSA	-1.11044	-0.552115	0.631203	1.03135
5260201	TRP53INP1	-0.601714	-1.06059	0.574775	1.08753
4210632	IRAK2	-0.485965	-1.17587	0.843531	0.818304
4260296	ERCC5	-0.939426	-0.722322	1.15877	0.502982
6660041	MKX	-0.568708	-1.09262	1.05732	0.604002
2970324	HDC	-0.897427	-0.7638	0.490469	1.17076
7550673	HPX	-0.55189	-1.10933	0.62446	1.03676
3400349	GPS2	-1.07985	-0.581313	1.0717	0.589464
7550753	D17H6S56E-3	-1.06491	-0.596213	1.08633	0.574798
3290296	TOP1MT	-0.807013	-0.853742	0.483391	1.17736
2100189	CNGA4	-0.829085	-0.831601	1.17828	0.482407
20152	TXNDC17	-0.802056	-0.858487	1.17741	0.483136
6450021	ELMO1	-1.04558	-0.614884	0.556286	1.10418
7330368	ZFP780B	-0.547251	-1.1132	1.03363	0.626828
5700441	9130019O22RIK	-1.14247	-0.517888	0.985376	0.674979
510368	FOS	-0.573718	-1.08657	0.59357	1.06672
650291	CALR	-0.505103	-1.15515	0.703091	0.957163
4210600	NDUFA6	-0.753248	-0.906903	1.17073	0.489419
1570255	CHRM3	-0.537462	-1.12266	1.02082	0.639304
6840356	DNAJB6	-1.17363	-0.486141	0.896342	0.76343
6620619	KCNK9	-0.633189	-1.0262	0.53885	1.12054
2760707	PPP2R5C	-0.498723	-1.16063	0.9469	0.712454
1470519	EG433224	-1.02802	-0.63099	0.538935	1.12008
5130750	RAP1GAP	-0.601295	-1.05734	0.560112	1.09852
5570048	6530403A03RIK	-1.05842	-0.599847	1.09839	0.559883
6840066	OLFR734	-0.647908	-1.01034	1.13288	0.525363
6450020	DMN	-1.03353	-0.624334	0.539305	1.11856
7510309	EAPA2	-0.860142	-0.797617	1.18235	0.475411
1580377	SULT1C2	-1.10164	-0.556043	1.05606	0.60162
3390328	SLC35C1	-0.678213	-0.979449	0.507285	1.15038
3310398	TTC24	-0.474338	-1.1833	0.807174	0.85046
5720239	INPP5F	-0.853475	-0.804104	0.474378	1.1832
5420259	TFPT	-0.531158	-1.12629	1.02337	0.634078
2260458	PLTP	-0.791864	-0.865535	0.474922	1.18248
4900240	TEDDM1	-1.18424	-0.473087	0.814588	0.842739
540136	CLRN1	-1.15	-0.5071	0.98243	0.67467
4830095	PHYH	-0.747613	-0.909248	1.1761	0.480761
3140678	PIP4K2A	-0.598042	-1.05874	0.5555	1.10129
5670451	SOX9	-0.779694	-0.877083	0.474589	1.18219
160240	SCAMP1	-0.537115	-1.11946	1.03587	0.620705
6580280	KLRA19	-0.694694	-0.961703	0.496007	1.16039
3290152	EG229862	-0.553985	-1.10234	1.05865	0.597673
2650626	RDH14	-0.469929	-1.18634	0.819112	0.837154
10390	ARMCX6	-0.53134	-1.12481	0.626726	1.02942
6480564	HIST1H3F	-0.486079	-1.17005	0.936058	0.720071
4060364	HSD17B6	-0.764061	-0.891959	0.474868	1.18115
6060113	SCML4	-1.1447	-0.511131	0.99748	0.658356
6060152	5630401D24RIK	-0.525094	-1.13072	1.02141	0.634405
6250632	MBTPS1	-1.17798	-0.477677	0.745392	0.910264
3870148	FRAS1	-0.868015	-0.787334	0.469508	1.18584
5550736	SDSL	-1.12701	-0.528287	1.02859	0.626714
2900224	DDX5	-1.15818	-0.497063	0.683312	0.971927
7150014	DBT	-0.778121	-0.87708	0.470241	1.18496
1770239	RGS10	-0.832258	-0.822734	0.46628	1.18871
6520438	RAB14	-1.18445	-0.470473	0.771125	0.883798
2260561	PECR	-0.553337	-1.10154	1.06314	0.591744
240524	ABCC1	-0.983406	-0.671253	1.15397	0.500693
6450288	CDSN	-0.748809	-0.905814	1.18079	0.473831
5270349	OLFR1102	-1.18264	-0.471962	0.75746	0.897143
6130242	SLC24A5	-1.10201	-0.552506	1.06348	0.591041
1170113	NF1	-0.528522	-1.12566	1.03374	0.620436
830673	HNRNPH3	-0.562993	-1.09101	0.577142	1.07686
1580224	HDAC3	-0.579274	-1.07463	0.560566	1.09334
1110255	RAP2IP	-0.639283	-1.01447	0.514842	1.13891
3780239	ADK	-0.464932	-1.18878	0.86733	0.786378
4070014	ADORA3	-1.00412	-0.649438	0.508298	1.14526
5220324	TNFRSF11B	-0.480734	-1.17281	0.941441	0.712105
1820368	6330503C03RIK	-1.03791	-0.615456	1.1243	0.529063
5670465	PVRL3	-0.902497	-0.750855	1.1837	0.469653
270347	EG328231	-0.596857	-1.0561	0.541642	1.11132
580465	LOC100046855	-0.511651	-1.1413	0.640017	1.01293
6760474	ZCCHC5	-0.530399	-1.12251	1.04162	0.611286
4730382	PPP3CB	-0.595839	-1.05705	0.542173	1.11071
2900608	GPR27	-1.19229	-0.460485	0.843444	0.809326
4220482	MTBP	-0.855889	-0.79687	1.19151	0.461245
6200554	PHACTR1	-0.589242	-1.06338	1.10599	0.546637
5220278	ST7	-0.793757	-0.858862	1.1915	0.461119
3440376	EPHA1	-0.640527	-1.0119	1.14286	0.509563
6650692	TRIM68	-1.10934	-0.542877	1.06034	0.591882
2480592	KEG1	-1.053	-0.598813	1.11605	0.535763
4920121	1110017D15RIK	-0.649512	-1.00219	0.502061	1.14964
7100113	LRRC67	-0.772645	-0.878707	1.19133	0.460017
7610541	ACCN3	-0.486584	-1.16473	0.972669	0.678644
3440731	DOCK9	-1.0258	-0.625406	0.514681	1.13653
5690132	SHC3	-0.834093	-0.816717	1.196	0.454813
5810091	RNF133	-0.909316	-0.741372	1.18668	0.464009
3370328	ZSCAN21	-0.6166	-1.03394	0.518148	1.13239
4900474	DDB2	-1.16336	-0.486977	0.979491	0.670849
5270411	TAS2R115	-0.50686	-1.14338	1.01763	0.632611
5270301	WNT16	-0.844282	-0.805885	0.453458	1.19671
4480364	AEBP1	-0.922354	-0.727756	1.18436	0.465749
4480603	ATP1B3	-1.16419	-0.485891	0.67145	0.978633
6200181	SYNCRIP	-1.17165	-0.47838	0.688817	0.96121
4590619	LRRN3	-0.514142	-1.1357	0.61895	1.03089
1780025	RAB34	-0.491923	-1.15761	0.994267	0.655269
380068	MAGI3	-0.897642	-0.751794	0.458163	1.19127
3060458	INHBA	-0.926583	-0.722818	0.465035	1.18437
5130687	SLC6A9	-0.454066	-1.19524	0.875268	0.774037
7330050	PTRH1	-0.781452	-0.8678	0.452979	1.19627
5670020	PECAM1	-1.16874	-0.480382	0.677092	0.972026
6220014	ZFP67	-1.1783	-0.470783	0.947516	0.701564
6200465	MRGPRB8	-0.996559	-0.652474	1.1573	0.491731
2750750	SOX12	-0.71882	-0.930209	0.465097	1.18393
2760575	NOLA3	-0.45644	-1.19252	0.753676	0.895283
3060682	SHPRH	-0.559954	-1.089	0.558937	1.09001
990598	RFPL4	-0.8642	-0.7847	0.451646	1.19725
3940343	RBL2	-0.645635	-1.00315	0.494548	1.15424
5290358	GSTP1	-0.581264	-1.06748	0.538509	1.11024
2810041	GTF3C4	-1.19888	-0.449719	0.797085	0.851518
940180	PIK3IP1	-0.913156	-0.735347	1.18937	0.459129
3890288	HRC	-0.463543	-1.18495	0.929726	0.718768
5810044	RARG	-0.906121	-0.742074	0.456675	1.19152
240025	ISLR2	-0.447931	-1.20023	0.840964	0.807202
4780253	OASL1	-0.662469	-0.985559	0.483568	1.16446
60041	IL11RA1	-1.17428	-0.473282	0.964941	0.682617
2630209	PVR	-0.822726	-0.82472	1.20182	0.445624
4120215	CEACAM13	-0.835032	-0.812211	0.445252	1.20199
4180142	GA17	-1.19973	-0.447392	0.868102	0.779024
1450671	PPA2	-0.587245	-1.05973	1.12001	0.526972
4830168	LOC100047323	-0.527992	-1.11874	1.06187	0.584865
6250477	RORA	-0.727196	-0.919381	1.19093	0.455649
6480053	EVA1	-1.17383	-0.472716	0.676439	0.970104
3780743	FGF17	-1.00442	-0.641968	1.15765	0.488732
1660541	TRUB1	-0.785211	-0.861071	1.20188	0.444406
6550369	TBC1D5	-1.19681	-0.449434	0.895931	0.750311
5360441	RAVER2	-0.852881	-0.793226	1.20289	0.443215
5870133	2610204K14RIK	-0.672805	-0.973119	1.17356	0.472363
3190438	MGST1	0.759016	0.886519	-0.445883	-1.19965
6520440	ARL16	0.479396	1.1662	-0.65524	-0.990359
5810672	LY6I	0.641322	1.00433	-0.486699	-1.15895
4730692	CAR12	0.478034	1.16767	-0.658781	-0.986928
3370075	GOLPH3	0.588951	1.05698	-1.12411	-0.521829
60470	RBPMS2	1.19691	0.449143	-0.749135	-0.896921
6860524	DNMT3A	0.829063	0.817483	-0.443261	-1.20329
4480523	AMPH	1.07211	0.574465	-1.11047	-0.536106
610670	4930453N24RIK	1.20173	0.444968	-0.791434	-0.855265
2000053	LOC100045621	1.08732	0.559424	-1.09623	-0.550507
5550279	FOXI1	0.929387	0.71737	-0.458879	-1.18788
4880161	EXTL2	1.15516	0.491609	-1.00778	-0.638984
6480279	SEL1L2	1.0194	0.627442	-1.14831	-0.498525
2650113	SMPD1	0.738961	0.907903	-1.19327	-0.45359
610768	PRPF3	1.19758	0.449438	-0.884661	-0.762355
160053	USP9X	0.933219	0.713942	-0.461073	-1.18609
1190075	OBFC2B	0.951181	0.696077	-1.18	-0.467256
4250228	DHCR24	0.788317	0.859049	-1.2003	-0.447065
5870754	ALDH4A1	0.461711	1.18587	-0.715932	-0.931651
4830520	SACM1L	0.763247	0.884555	-1.19632	-0.451483
4290612	NLGN1	1.02945	0.618364	-1.14031	-0.507499
1850349	ZMPSTE24	0.550345	1.09753	-1.08356	-0.564311
4570577	LOC382133	1.19647	0.451672	-0.768038	-0.8801
5810747	ATP2C1	0.449944	1.19824	-0.866007	-0.782178
4830044	CYP2C39	0.535536	1.11268	-1.06581	-0.5824
4280010	OVOL1	0.674911	0.973497	-1.16929	-0.479115
5420520	PSMD8	0.857332	0.791257	-1.19844	-0.450149
1300246	ELAVL2	1.06047	0.588142	-1.11631	-0.532301
3120546	SLCO2B1	0.449041	1.19967	-0.820759	-0.827953
5290209	ILF3	0.908263	0.740637	-1.18988	-0.459017
4570463	KCNK5	0.536259	1.11268	-0.584831	-1.06411
3710026	ABCC10	1.07265	0.576519	-1.1049	-0.54427
4920619	ARX	0.634859	1.0144	-1.14707	-0.502187
6510333	SFRS1	0.581149	1.06843	-1.10779	-0.541788
7040619	CLIC4	0.647333	1.00241	-1.15297	-0.49678
830619	REG3G	1.17542	0.47439	-0.952214	-0.697594
4230398	MRPL55	0.492953	1.15694	-0.994382	-0.65551
2190056	MDFIC	0.473387	1.17665	-0.947644	-0.702397
2340403	ZFP41	0.652406	0.997879	-1.15445	-0.495835
1470392	LOC100046518	0.74641	0.903905	-0.4618	-1.18852
4760112	CRYZ	0.577954	1.07278	-0.549084	-1.10165
6840433	NPM1	1.04628	0.604518	-0.527671	-1.12313
4570369	4933429F08RIK	1.18975	0.46108	-0.893543	-0.757286
1230187	TRPD52L3	0.979554	0.671378	-1.16232	-0.488616
1780379	CACNA1C	1.19129	0.459946	-0.880368	-0.770867
1190735	NAPEPLD	0.568603	1.08268	-0.560023	-1.09126
1110241	HSP90AA1	0.719459	0.931962	-0.471995	-1.17943
2810349	MDGA2	1.08337	0.568259	-1.08986	-0.561769
2470239	MPP2	0.581467	1.0702	-1.10203	-0.54963
5720326	DPPA4	1.15293	0.498878	-0.995647	-0.656165
2360360	CD300LB	0.668572	0.983646	-0.494041	-1.15818
940427	SGOL1	0.479349	1.17301	-0.705525	-0.946837
4150066	NLRP1C	1.01985	0.632577	-0.514362	-1.13806
7330730	RAB22A	1.1562	0.496235	-0.665461	-0.986973
290279	AI661453	1.14405	0.508491	-1.00951	-0.643032
3840192	TMEM111	0.611185	1.04136	-1.1234	-0.52914
4070750	SPATA3	0.472082	1.18053	-0.731684	-0.920932
6130372	FBXW13	0.689608	0.963022	-1.16649	-0.486141
110500	OVOL2	1.11791	0.534819	-0.604469	-1.04826
1660494	TRMU	0.504867	1.14789	-1.00197	-0.65078
4180491	KCNMB4	1.13592	0.517017	-1.02174	-0.6312
7330750	GPR174	0.461881	1.19133	-0.84698	-0.806235
1230358	PCCB	0.498752	1.15462	-0.986828	-0.666541
1400564	AF067061	1.1893	0.464088	-0.7858	-0.867587
160044	PON3	0.46817	1.18523	-0.758886	-0.89451
3190537	OLFR630	0.965318	0.688247	-1.16393	-0.489632
4560619	SQSTM1	1.08634	0.567599	-1.08188	-0.572059
2600148	LHFPL4	0.464152	1.18998	-0.812282	-0.841849
1190066	CKAP5	0.494994	1.15955	-0.682951	-0.971596
1240075	OLFR1221	0.960274	0.694399	-0.49065	-1.16402
6520474	ZC4H2	0.901251	0.753576	-1.18142	-0.473407
3780193	GSTA3	0.862479	0.792488	-1.18709	-0.467875
3400546	SLC12A2	1.06955	0.585758	-0.560317	-1.09499
3450167	SNX10	0.529095	1.12626	-1.02953	-0.625822
830553	ALOXE3	0.721081	0.934314	-0.483507	-1.17189
7050717	VWA5A	0.859932	0.795652	-1.18624	-0.46934
6290187	HINT1	0.494292	1.16137	-0.962507	-0.693159
770543	OTTMUSG00000010009	1.18721	0.468483	-0.813642	-0.842049
510538	MAPK15	1.17699	0.478725	-0.741768	-0.913947
5720598	UMOD	1.08159	0.574137	-0.573089	-1.08264
1690187	LY6A	0.476707	1.17907	-0.751303	-0.904478
3290403	SLC25A15	0.59036	1.0655	-0.558438	-1.09742
840685	MPP5	1.13177	0.524182	-0.636631	-1.01932
1570184	BXDC1	1.18663	0.469529	-0.823943	-0.832213
3990458	HYAL4	0.627067	1.02942	-1.12414	-0.532347
1770053	PPP1CB	0.730659	0.925895	-1.17235	-0.484205
2000139	CENPL	0.48761	1.16918	-0.93514	-0.721647
2350551	RLTPR	1.01907	0.637919	-1.12994	-0.527051
2480746	ELL2	1.13019	0.526845	-0.638516	-1.01852
1090204	POU4F2	0.478307	1.17879	-0.762563	-0.89453
1470014	ACAD8	0.801129	0.856127	-1.18359	-0.473671
610402	RPSA	0.809622	0.847654	-1.1841	-0.473172
2810202	CHMP2A	0.679605	0.977671	-1.15191	-0.505364
7330228	2810439F02RIK	0.875122	0.782178	-1.18152	-0.475778
2320152	ANKMY1	1.16592	0.491388	-0.942294	-0.715015
7160709	LOC100048056	0.834538	0.822841	-1.18438	-0.473002
5720020	PDE4DIP	0.556978	1.10054	-1.0578	-0.599715
2570669	MAPK1	1.18214	0.475543	-0.793766	-0.863914
5890010	NDUFS8	0.539122	1.11858	-1.03395	-0.623758
1980554	RBM10	1.16385	0.493943	-0.712021	-0.945776
5870553	OPHN1	0.982217	0.67568	-1.14863	-0.509264
4560156	KRTAP9-1	1.06108	0.596928	-0.561345	-1.09666
5290148	SETD5	1.16309	0.495022	-0.946314	-0.7118
5490142	ICA1	0.493153	1.16498	-0.717472	-0.940664
3290685	PSMA1	1.05659	0.601664	-1.09998	-0.558274
6760561	PWP1	1.11442	0.543845	-1.03814	-0.620129
1820725	MTA3	0.557213	1.10125	-0.603927	-1.05453
620064	TNNT1	0.48118	1.1773	-0.769391	-0.889087
6330438	LOC100039728	0.662279	0.996215	-1.14041	-0.518086
1400747	ORF63	1.14603	0.512687	-0.984411	-0.67431
4780189	ANKRA2	1.06697	0.592213	-1.08882	-0.570362
5860356	RPS6KA1	0.731234	0.927997	-1.16695	-0.492277
5220360	OSBPL8	0.934195	0.725175	-0.49454	-1.16483
4260575	OLFR316	0.604056	1.05546	-0.561302	-1.09821
6290400	AU042651	0.785491	0.874086	-1.17755	-0.482026
2370471	SHROOM3	1.09561	0.563996	-1.05826	-0.601347
3370497	SPATA16	1.14506	0.514607	-0.676882	-0.982781
2510672	COX7B2	1.00354	0.656176	-1.134	-0.525713
5870064	USP38	1.10702	0.552766	-0.615968	-1.04381
3990053	F2R	0.668642	0.991149	-1.14061	-0.519179
2570646	MRPL51	1.17102	0.488798	-0.908314	-0.751503
3780291	PKM2	0.501609	1.15825	-0.708907	-0.950948
3450544	6330578E17RIK	0.494583	1.16542	-0.928474	-0.731525
6130053	6030419C18RIK	1.1774	0.482643	-0.791843	-0.8682
3130706	ACSS2	0.654219	1.0061	-0.528974	-1.13135
7200201	1810019J16RIK	0.785582	0.874986	-1.17562	-0.484946
2070754	RBM12B	1.08622	0.574694	-0.595371	-1.06554
2490674	1810007P19RIK	0.483608	1.17733	-0.848373	-0.812569
4890402	TESK1	0.890597	0.770446	-0.488674	-1.17237
630678	MTA3	0.636166	1.02494	-1.11791	-0.543205
5720360	IFT81	1.15296	0.508206	-0.702725	-0.958435
520332	2810055F11RIK	0.649077	1.01217	-1.12587	-0.535371
3930164	RBM24	0.501307	1.15995	-0.938587	-0.722672
4260152	RORC	0.492345	1.16906	-0.904025	-0.757383
6510253	HIST1H2AO	0.871308	0.790205	-0.487181	-1.17433
4540242	LYRM2	0.511667	1.14988	-0.697366	-0.964183
870072	SNAI3	1.14616	0.515643	-0.971684	-0.690117
4640152	GCGR	0.936616	0.725249	-1.15946	-0.502401
6330730	NDUFA9	0.993545	0.668356	-1.13526	-0.526637
4150008	IGF2R	1.03702	0.624889	-1.10766	-0.554244
2060544	CHST2	0.67567	0.986249	-1.13901	-0.522907
5810722	EBPL	1.05481	0.6072	-1.09326	-0.568742
870066	HAVCR2	0.490894	1.17188	-0.790665	-0.872108
4490730	ABI3BP	1.06164	0.60128	-1.08516	-0.577757
430463	ITGB2L	1.06175	0.601317	-1.08471	-0.578366
460327	SLC2A3	1.17361	0.489501	-0.825668	-0.837441
6020491	TSC1	0.965844	0.69727	-1.14619	-0.516925
7560114	OSBPL3	0.930906	0.73223	-1.15886	-0.504273
290605	DAB2	1.04033	0.622913	-1.10227	-0.560976
5890131	ARHGAP10	0.497881	1.16558	-0.761094	-0.902369
2190538	LASP1	0.700031	0.96349	-1.1464	-0.517123
7210273	SYT12	0.559661	1.10389	-1.03734	-0.626205
3890544	1810037C20RIK	0.749385	0.914185	-1.16266	-0.500909
840673	LMNB1	0.970222	0.693377	-0.52026	-1.14334
2190475	MS4A6D	0.568994	1.09466	-1.04875	-0.614905
3710563	SYTL2	1.06097	0.602789	-0.579925	-1.08383
4560154	RNASEH2C	0.847862	0.815912	-1.17199	-0.491779
60689	GABRA6	1.05523	0.608749	-1.08841	-0.575567
770561	MAGEB3	0.540517	1.1235	-1.0068	-0.657216
630139	WBSCR28	0.541774	1.12227	-1.00875	-0.655298
5890039	NAB1	0.513067	1.15102	-0.948915	-0.715173
5890707	LTBP4	1.13653	0.527569	-0.982624	-0.681478
5290561	PRR13	1.13806	0.526419	-0.686532	-0.977946
6650372	UPF2	0.962949	0.701644	-1.14454	-0.520055
1430719	DGKK	1.11126	0.5534	-1.02378	-0.64088
3990520	ABR	0.494891	1.16984	-0.853696	-0.811031
2850092	IFNG	0.70083	0.963945	-1.14376	-0.52101
1690195	PCDH18	0.655221	1.00957	-1.12023	-0.544559
1430603	RARS	1.12749	0.537617	-0.669096	-0.996013
3710403	P2RY6	0.985761	0.679457	-1.13272	-0.532494
5820673	D230025D16RIK	0.508601	1.15662	-0.740233	-0.92499
1850139	DPYD	0.525671	1.13969	-0.970649	-0.69471
840360	AU040829	0.898973	0.766702	-0.503611	-1.16206
1230541	PTPRC	0.909433	0.756298	-1.15968	-0.506053
870373	MLYCD	0.919691	0.746468	-0.509882	-1.15628
6900561	LOC100047009	0.563099	1.10313	-1.03041	-0.635823
7400431	NSMCE2	0.524077	1.14219	-0.70563	-0.960639
1240612	OLFR97	0.76195	0.904458	-0.506914	-1.15949
4230093	IARS	1.08928	0.577166	-0.618966	-1.04748
3120050	A130030D10RIK	1.08011	0.586484	-1.05762	-0.608974
2690403	GPR103	1.16252	0.504154	-0.885697	-0.780975
1300670	SFRS12	0.500521	1.16629	-0.825305	-0.841502
7200215	OLFR1320	1.15375	0.513063	-0.924207	-0.742607
1500364	STK35	0.519911	1.14713	-0.943643	-0.723403
4390553	6330505N24RIK	0.836617	0.83058	-0.501607	-1.16559
2760164	OLFR591	0.810336	0.856899	-1.16471	-0.502523
6350133	OCIAD2	0.672247	0.995121	-0.544066	-1.1233
1660386	TTLL10	0.50859	1.15894	-0.77109	-0.896443
5860753	PLEKHA4	0.877492	0.790419	-1.16128	-0.506633
1430170	2310001A20RIK	1.15408	0.513922	-0.753745	-0.914253
5490187	SRGN	0.613421	1.05471	-0.589126	-1.079
1580524	RDH1	0.530794	1.1375	-0.706203	-0.962093
2570167	RAP1A	0.516583	1.15176	-0.920519	-0.747823
580411	TRUB2	1.05644	0.611945	-1.07679	-0.5916
150129	TMEM2	0.818759	0.849701	-1.16268	-0.505775
4040195	SHANK3	0.911115	0.757704	-1.15322	-0.515602
5310739	5033411D12RIK	1.15339	0.515472	-0.758795	-0.910064
2370520	AHNAK	1.15258	0.51657	-0.758094	-0.911053
4810292	GALNT12	0.651493	1.01775	-0.563911	-1.10533
3390440	SYNGR4	0.513576	1.15569	-0.895515	-0.773746
5560056	BCDO2	0.996424	0.672945	-0.551056	-1.11831
130608	LAG3	0.550091	1.11955	-0.993161	-0.676484
4250711	HIST1H2AF	0.515611	1.1541	-0.77067	-0.899039
5860056	CHRNB3	1.12541	0.54454	-0.980834	-0.689119
6020008	MAPT	0.552087	1.11796	-0.994468	-0.675577
2940685	DDX39	1.13698	0.533116	-0.715794	-0.954305
780634	TAX1BP3	0.609745	1.06038	-1.06867	-0.601458
4200204	SH3BP2	1.10466	0.565557	-1.01546	-0.654756
2000180	PRDX4	1.15665	0.513607	-0.876959	-0.793296
130563	UBXD8	0.579366	1.09109	-0.63694	-1.03352
130754	HIST1H2BK	0.829041	0.841509	-1.15868	-0.511868
650044	ZFP688	0.571721	1.09886	-0.647913	-1.02267
4570161	GRIN1	1.14486	0.525836	-0.742711	-0.927989
4900685	YIF1B	0.660598	1.01033	-0.564511	-1.10642
5080551	AU022870	0.513171	1.15782	-0.837576	-0.833414
670551	CDKL2	1.04384	0.627613	-1.08028	-0.591181
6370594	ATP2A3	1.08732	0.584281	-0.636747	-1.03485
6290086	TRIM31	0.911999	0.759686	-1.14719	-0.524498
5820215	GBGT1	0.690601	0.981115	-0.550229	-1.12149
430446	IL18RAP	0.515928	1.15585	-0.850121	-0.821658
6660475	1190003J15RIK	0.540717	1.1311	-0.711907	-0.95991
4810368	SAE1	1.00996	0.661859	-1.10463	-0.567196
4220523	OLFR1477	0.598311	1.07375	-1.04958	-0.622479
6200044	ADAMTSL5	0.963317	0.708895	-0.543411	-1.1288
3060687	RPL29	0.610875	1.06169	-1.06092	-0.61164
840278	MED11	0.774105	0.898587	-1.14808	-0.524613
4730008	MATN2	0.865463	0.807326	-1.15269	-0.5201
3170047	NRAP	1.02012	0.652781	-0.577654	-1.09524
3940408	1700015E13RIK	0.845954	0.827036	-0.519536	-1.15345
290112	HMG20A	0.663121	1.00988	-1.10197	-0.571032
6220091	CENPB	0.552681	1.12037	-0.977547	-0.695501
6940360	SYT7	0.521832	1.15137	-0.870024	-0.803179
6450082	PPP3CA	1.10826	0.565211	-0.675427	-0.998044
650369	PNOC	1.11869	0.554899	-0.978526	-0.695061
6480561	ASB6	0.631032	1.04257	-0.597674	-1.07593
6560468	2410042D21RIK	1.14049	0.533195	-0.921597	-0.75209
1170131	COL4A6	0.829784	0.843932	-0.521761	-1.15196
2350025	OLFR571	0.591691	1.08203	-0.638834	-1.03489
6100639	DNM3	0.52384	1.14989	-0.800369	-0.87336
730338	ZMPSTE24	1.0641	0.609674	-1.05511	-0.618654
5550035	RRAD	1.15113	0.522658	-0.858736	-0.81505
1440050	P2RY12	1.14861	0.52526	-0.792952	-0.88092
4390288	GAL	1.11236	0.561572	-0.989054	-0.68488
5220142	D3UCLA1	0.932116	0.741977	-0.537599	-1.13649
650161	LOC100041835	0.563673	1.11064	-0.990619	-0.683691
1110465	AFG3L1	0.526231	1.14809	-0.796574	-0.877747
1820053	AP1M2	0.539295	1.13521	-0.741132	-0.933372
4540014	PDC	1.08699	0.587847	-1.02495	-0.64989
780068	OLFR31	0.598502	1.07642	-1.03799	-0.636939
6350044	SLC2A1	1.1388	0.53613	-0.918065	-0.756868
4570368	ERRFI1	0.721398	0.953554	-1.12695	-0.548004
3390017	1700011F14RIK	0.739681	0.935411	-1.13328	-0.541815
6270487	HDGFRP3	0.623252	1.05195	-0.611961	-1.06324
2490170	BC025546	1.14188	0.533511	-0.774417	-0.900974
3360270	COX7A1	1.14136	0.53408	-0.902951	-0.772488
7200358	ARF6	1.05378	0.621673	-0.614656	-1.06079
3890528	RGS16	0.677848	0.997645	-1.10382	-0.571674
5090195	SETD6	1.12724	0.548314	-0.726128	-0.949428
5900044	SLCO1C1	0.847319	0.828256	-0.527735	-1.14784
6020445	1700047I17RIK1	0.563405	1.11225	-0.693632	-0.982018
1110719	FRMD6	1.00294	0.672795	-1.09999	-0.575746
6620474	SIAH1B	0.529505	1.14631	-0.811228	-0.864586
2340102	IL20RA	0.807284	0.869024	-1.14482	-0.531488
1070687	USP4	0.60999	1.06638	-0.631238	-1.04513
2190102	TSPAN33	1.03956	0.637039	-1.0707	-0.605895
940594	VSX2	0.800406	0.876294	-0.533556	-1.14314
730736	NAB1	0.636714	1.04	-1.07	-0.606712
2100554	GM97	1.14007	0.536774	-0.782645	-0.894197
1990035	BUB3	0.685753	0.991341	-1.10375	-0.573346
7200519	CENPA	0.734375	0.942964	-1.1257	-0.551635
1990450	MYOG	0.715793	0.961554	-1.11823	-0.559115
1240070	SRP72	1.09259	0.584873	-0.669551	-1.00791
5700014	KLRG1	1.07698	0.600505	-0.648284	-1.0292
4250167	TM9SF2	0.636348	1.04114	-0.610612	-1.06688
4730739	PARK7	1.07568	0.601967	-0.647393	-1.03026
5890494	HSD3B7	0.827343	0.850333	-1.14309	-0.534587
4570026	OLFR1310	0.677097	1.00068	-0.581303	-1.09648
70270	ZKSCAN6	1.13506	0.542783	-0.907646	-0.770198
6650242	SMU1	0.762593	0.91539	-1.13284	-0.545138
5340112	ASB17	0.692468	0.985608	-1.10465	-0.573429
7650477	IL11	0.921493	0.756686	-0.547425	-1.13075
4730189	IFT74	0.647243	1.03103	-1.07339	-0.604886
840475	TAX1BP1	0.537804	1.14062	-0.814567	-0.863854
2060543	CD79B	1.13655	0.541921	-0.784772	-0.893701
4050753	OLFR883	0.662881	1.0156	-0.593783	-1.0847
6650201	LSM2	0.695196	0.983291	-1.10493	-0.573552
6290747	SLC25A14	0.880738	0.797771	-0.53995	-1.13856
2810110	PRKAR2B	0.779367	0.899228	-0.543378	-1.13522
5670040	CRYBG3	0.870937	0.807664	-1.13955	-0.539051
290253	LOC433801	1.00837	0.670487	-0.590092	-1.08877
4890338	MTX1	0.548196	1.13069	-0.762973	-0.915913
1450066	DNAJC15	0.808078	0.870911	-1.13868	-0.540308
110259	CDC7	0.552416	1.12658	-0.74961	-0.929381
2600324	LOC100047368	0.780617	0.898383	-1.13448	-0.544523
2690348	DENND5B	1.13889	0.540509	-0.822562	-0.856838
7380678	SGCZ	1.06439	0.615113	-0.641848	-1.03766
1780673	ADCY4	0.92851	0.751013	-1.12564	-0.553887
6900767	SORBS2	1.12029	0.559255	-0.7355	-0.944046
6250020	NTNG2	0.713621	0.965986	-1.11098	-0.568624
2320762	ARPC5	1.13453	0.545232	-0.790982	-0.888776
7150204	CELSR3	0.869384	0.810402	-1.13703	-0.542757
2100053	THBS4	0.562809	1.11721	-0.949229	-0.730789
7160136	TCFAP2B	1.05218	0.627846	-1.04917	-0.630851
20465	SRPK3	0.783366	0.896658	-1.1325	-0.547521
510739	PDIA6	0.848841	0.831535	-0.543382	-1.13699
2000546	F8	0.743514	0.937003	-0.559952	-1.12057
3370338	1110058L19RIK	0.997786	0.682768	-1.09139	-0.589159
870092	ARHGEF6	1.1366	0.54396	-0.847241	-0.833321
2370373	RBM19	0.996464	0.684139	-1.0921	-0.588505
2630053	WARS2	0.686608	0.994146	-1.09314	-0.587616
6660367	AIRE	0.555732	1.12506	-0.760161	-0.92063
830445	SLC6A13	1.13567	0.545169	-0.855099	-0.825741
2100017	ACSM2	1.03436	0.646616	-1.06315	-0.617826
2470243	PLOD3	1.06585	0.615338	-0.650716	-1.03048
7610639	SYT8	1.13205	0.549144	-0.797715	-0.883484
4900193	SPEER4D	1.13371	0.547544	-0.812358	-0.868894
4180392	DMAP1	0.923631	0.757636	-1.12309	-0.558178
6940184	CCL4	0.549701	1.13162	-0.88461	-0.796706
3290181	OLFR1217	0.557396	1.12398	-0.919587	-0.761793
3180114	LOC100046953	0.833897	0.847498	-1.13465	-0.546744
1580168	KLHL30	0.785078	0.896399	-1.12922	-0.552259
5890112	OLFR315	0.878247	0.803287	-1.132	-0.549533
2030682	TLR3	1.13314	0.548409	-0.867531	-0.81402
6840202	AOX3L1	0.963295	0.718256	-0.573974	-1.10758
5860386	CDYL	1.13327	0.548368	-0.818225	-0.863418
4850553	OLFR1431	0.617358	1.06436	-0.651255	-1.03047
1030484	HNRPM	0.628179	1.05357	-1.04244	-0.639304
3170747	CDKL2	0.880063	0.80173	-1.13116	-0.550633
60626	LOC637082	0.697561	0.984269	-1.09621	-0.585621
1510097	SYT16	0.632113	1.04982	-0.636174	-1.04575
1780608	HDGF	0.666743	1.01524	-1.07573	-0.606252
2480139	MIA1	0.832237	0.849779	-0.548889	-1.13313
130064	NUP54	0.789627	0.892399	-1.12868	-0.553343
3710521	HELLS	0.859096	0.823271	-1.13187	-0.550496
10767	KLHL13	0.581368	1.10107	-0.710151	-0.972287
5080767	ACTN4	1.03888	0.643595	-1.05474	-0.627734
6960605	CMTM5	0.63689	1.0456	-1.04825	-0.634238
510288	MYH11	0.853132	0.829372	-1.13185	-0.550653
150019	LITAF	0.602371	1.08028	-1.00639	-0.676256
5560066	STAT4	0.581083	1.10176	-0.96887	-0.713974
1030292	INTS1	0.662291	1.0206	-0.613741	-1.06915
2510358	OLFR849	0.717268	0.96581	-1.10265	-0.580425
670097	PTPRS	0.982577	0.700647	-1.09362	-0.589605
7320592	UBQLN1	0.561008	1.12224	-0.773894	-0.909356
1570619	SLC30A5	0.752134	0.931344	-1.11546	-0.56802
5570280	ARF3	0.844913	0.838718	-1.12936	-0.554267
940497	BMPR1B	1.02939	0.654252	-0.623915	-1.05973
2510360	OLFR589	1.12302	0.560635	-0.901741	-0.781911
6960189	FURIN	0.590545	1.09313	-0.702271	-0.9814
160446	FZR1	0.87095	0.812808	-0.556161	-1.1276
6650520	OPRS1	0.684275	0.999555	-1.08172	-0.602106
7650373	ABHD12	1.1288	0.555072	-0.844269	-0.839599
4900541	DCP1A	0.645652	1.03839	-1.05043	-0.633621
940753	POLR3K	0.556092	1.12798	-0.828126	-0.855943
110072	ZFP59	0.844475	0.83966	-1.12814	-0.55599
6380373	KLHL5	0.631611	1.05267	-1.03521	-0.649071
3400414	SRL	0.881854	0.802639	-0.559982	-1.12451
4200630	ZCCHC6	1.05038	0.634112	-1.03697	-0.647525
1070307	SELPLG	0.857052	0.827509	-0.557836	-1.12673
4490142	SLCO6C1	0.76136	0.923305	-0.569579	-1.11509
6200070	UPF1	1.00898	0.675944	-0.612692	-1.07223
3400324	4921505C17RIK	0.610808	1.07412	-1.00629	-0.678637
7150500	CCL4	1.07034	0.614614	-1.01141	-0.673552
1190465	RUSC2	0.967632	0.717458	-1.09669	-0.588403
7380167	BC003993	1.04862	0.636538	-0.648517	-1.03665
4540767	LOC100047834	0.838958	0.846265	-1.12545	-0.559774
3140220	CTPS	0.565773	1.11948	-0.900214	-0.785037
2600672	LOC100047155	0.916661	0.768818	-0.570499	-1.11498
6370164	KCNK5	0.63662	1.04888	-1.03523	-0.650279
2000725	NFATC2	0.733088	0.952726	-1.10166	-0.584151
60491	PCDHGB5	0.928398	0.757439	-1.11063	-0.575208
4150424	PACRG	0.573642	1.1123	-0.763792	-0.922146
1580634	ZBP1	0.747013	0.938934	-0.579187	-1.10676
6110133	CREB3L4	1.09565	0.590299	-0.96518	-0.720774
650112	RHOX9	1.07286	0.613333	-1.00303	-0.683162
3890246	V1RC22	0.569336	1.11686	-0.784626	-0.901573
3780382	SMAD5	0.616547	1.06974	-1.00706	-0.679225
3170440	ELFN2	0.607132	1.07939	-0.694706	-0.991814
2650138	OLFR415	0.651679	1.0349	-1.04579	-0.640792
4670753	CD97	0.619773	1.06694	-1.00919	-0.677524
1170554	PRKX	1.09006	0.59668	-0.714506	-0.97223
2000291	D030056L22RIK	0.682192	1.00494	-1.06885	-0.618279
2360326	CLEC1A	0.794909	0.892263	-1.11627	-0.570904
1850458	ENTPD1	1.05763	0.629608	-0.668093	-1.01915
5570356	BRCA2	0.567294	1.12008	-0.844267	-0.843103
1190653	ZMAT5	0.581301	1.10607	-0.756865	-0.930509
5820341	NUCB1	0.939984	0.747502	-1.10246	-0.585027
1240646	CCR5	0.567913	1.11961	-0.837655	-0.84987
5310431	FAM129A	1.02643	0.661183	-1.05026	-0.637362
5720164	LMCD1	0.952483	0.735187	-1.09697	-0.590696
7650348	2610018G03RIK	0.833923	0.853757	-0.568579	-1.1191
4230521	DPY30	1.06665	0.621144	-1.00534	-0.682444
1850373	1700055M20RIK	0.968603	0.719211	-1.08904	-0.598771
840070	CTSD	0.917397	0.770485	-1.10876	-0.579119
4150259	4930403C10RIK	1.09825	0.589773	-0.947197	-0.740828
4250241	OSR1	0.887982	0.800414	-1.11391	-0.57449
3370280	1700003M02RIK	1.07819	0.610274	-0.984969	-0.703496
6650564	ANKRD17	0.638508	1.04999	-1.0236	-0.664894
1190142	IGBP1B	1.11376	0.575009	-0.882611	-0.80616
1230484	FGF6	0.916632	0.772274	-0.582561	-1.10635
1740338	TINAGL	0.827261	0.861844	-1.11504	-0.574067
2370674	HCFC1	0.679052	1.01015	-0.630392	-1.05881
3460296	ANXA2	0.580456	1.10877	-0.78559	-0.903634
2850746	CCBL1	1.04564	0.643729	-1.02531	-0.664064
610189	NCAPG2	0.574859	1.11453	-0.831703	-0.857688
1340039	CARS	1.07136	0.618052	-0.69782	-0.99159
3310739	AMHR2	0.874274	0.815336	-1.11265	-0.576962
4780689	OLFR1226	0.584461	1.10521	-0.776171	-0.913498
6620187	NDRG1	0.946624	0.743085	-1.09402	-0.595683
7160228	PROM2	0.829712	0.860299	-0.577241	-1.11277
620435	GPR172B	0.580861	1.10921	-0.890155	-0.799919
4280301	HOXD12	1.1012	0.589003	-0.767528	-0.922676
830253	MGAT5	0.865179	0.825189	-0.578858	-1.11151
620349	PEMT	1.08961	0.600786	-0.952617	-0.737782
5820168	BCL2L11	0.666056	1.02467	-1.04175	-0.648975
4050553	AA415398	0.731218	0.959737	-0.606144	-1.08481
2480167	ZFP560	1.0995	0.591695	-0.771736	-0.919463
4210372	PLA1A	0.895025	0.796179	-0.58585	-1.10535
3290017	OLFR214	0.63943	1.05186	-1.01068	-0.68061
6450746	HSD3B5	0.582599	1.10889	-0.859224	-0.832267
7160167	EMP1	0.75509	0.936457	-1.09298	-0.598566
5670347	PTHR1	1.03961	0.652244	-1.02285	-0.669008
6520164	FZD2	1.05257	0.639439	-1.00689	-0.685117
5890180	3830406C13RIK	1.10405	0.587984	-0.889915	-0.802121
4560136	SLC39A10	1.05688	0.635174	-0.691035	-1.00102
620575	ARRB1	1.05905	0.633157	-0.694887	-0.997322
2940474	CASKIN2	0.846084	0.846311	-1.10677	-0.585625
5090209	TNP2	1.10119	0.591208	-0.899848	-0.792548
1340528	VAMP5	0.847152	0.84531	-0.585872	-1.10659
1850091	NXT1	0.93561	0.757029	-1.09028	-0.602363
610129	FAM164A	0.737699	0.955008	-0.610632	-1.08208
5870154	GAPDH	0.640567	1.05217	-1.0044	-0.688334
2340731	POMP	0.777954	0.915126	-1.09561	-0.597469
6220224	V1RC22	1.06103	0.632147	-0.703097	-0.99008
1230524	OOSP1	0.698431	0.995	-1.05685	-0.636581
1770360	CRISP2	0.962182	0.73141	-1.07606	-0.617535
830056	CYCS	0.700784	0.99288	-0.636067	-1.0576
1820075	PLEK	0.969253	0.724443	-1.07205	-0.621647
3520717	HIST1H2AD	0.68833	1.00551	-0.646143	-1.04769
290278	B3GALNT2	0.986799	0.707127	-1.06086	-0.633062
2360291	ZBTB33	0.864945	0.829227	-1.1012	-0.592974
4390239	FCHO1	0.912835	0.781739	-1.09206	-0.602514
7150475	FADS6	0.60959	1.08499	-0.759509	-0.935067
1690377	GUK1	0.871911	0.822924	-1.09875	-0.596088
5690711	C6	0.687489	1.00754	-0.653004	-1.04202
4830100	CAV2	1.09796	0.597197	-0.870692	-0.824464
4830240	KLHL2	0.740117	0.955064	-1.07481	-0.620369
6060376	ORC6L	0.839664	0.855572	-1.09866	-0.596572
7400575	KCNAB2	0.597344	1.09794	-0.866438	-0.828848
6040255	ZFP157	0.746898	0.948405	-1.07748	-0.617821
2100398	PTPRK	0.800955	0.89435	-0.601096	-1.09421
5960189	BLM	0.897916	0.797507	-1.09317	-0.602251
510653	ENAM	0.942077	0.753377	-0.615741	-1.07971
5870600	SHFM1	0.68254	1.01313	-1.03498	-0.66069
1400497	DEPDC1A	1.02231	0.673823	-1.02471	-0.67142
3420671	RNF111	0.613141	1.0832	-0.925466	-0.770875
270767	BPHL	1.09488	0.60164	-0.857873	-0.838645
7210156	NDUFB8	0.834064	0.862465	-1.09462	-0.601905
2480725	CORO1A	1.08774	0.608935	-0.790537	-0.906134
2120437	LRRC49	1.01371	0.683036	-1.03056	-0.666181
3370474	COL9A1	0.619112	1.07774	-0.760358	-0.936497
4730672	CAR5B	0.744628	0.952329	-1.0707	-0.626256
6290333	RBM41	0.872379	0.824701	-1.09224	-0.604835
630368	DDX51	0.619296	1.07778	-0.762484	-0.934596
1450402	RS1	0.985588	0.711652	-1.05093	-0.646314
670204	GIMAP7	0.743057	0.954353	-1.06834	-0.629075
270341	EMB	0.637596	1.05982	-0.970433	-0.726985
6940333	ZFP300	0.93509	0.762443	-1.07623	-0.621306
1990484	TCL1	0.763483	0.934233	-0.621723	-1.07599
2070561	EFCAB4B	0.61844	1.07938	-0.923715	-0.7741
1260113	TNS4	1.00701	0.690898	-1.03219	-0.66572
830360	SH3YL1	1.05119	0.646721	-0.981806	-0.716105
460427	5730419I09RIK	0.64425	1.05371	-0.977666	-0.720289
5220730	MTMR9	0.768395	0.929579	-1.07691	-0.621069
4290132	EG114600	1.06046	0.63752	-0.731865	-0.966112
4290152	2310016C08RIK	0.838257	0.860058	-1.08946	-0.60886
60647	VBP1	0.609519	1.08891	-0.863581	-0.834853
5670494	LOC100047369	0.870982	0.827568	-1.08801	-0.610543
6900408	LOC100045963	0.937449	0.761152	-1.07203	-0.626574
830176	FBXO25	0.956967	0.741892	-1.06244	-0.636414
2510204	APOA1	0.86136	0.837564	-1.08755	-0.611371
430484	NIP7	0.669216	1.02977	-1.00513	-0.693854
7200181	TRUB2	0.612607	1.08659	-0.835615	-0.863584
3930176	DBF4	0.62276	1.07646	-0.779863	-0.919357
2190092	SMYD3	1.08502	0.614213	-0.879419	-0.819814
7510088	EDAR	0.679217	1.02016	-0.685351	-1.01402
6840594	RGS1	1.08528	0.614113	-0.826542	-0.872849
1440470	PPP5C	0.773725	0.925815	-1.07338	-0.626165
7210546	CCKAR	0.994582	0.705041	-0.663579	-1.03604
7380364	CARHSP1	0.656354	1.04336	-0.715528	-0.984185
7400142	TK1	0.981445	0.718364	-1.04489	-0.654915
5050338	ZCCHC8	0.615186	1.08467	-0.838172	-0.861686
5870730	ARPC1B	0.629632	1.07032	-0.930827	-0.769122
6380164	CLDND1	0.940598	0.759492	-0.634065	-1.06602
6960612	UBE2I	1.08356	0.616595	-0.835175	-0.86498
4540435	CD300E	1.03171	0.668463	-0.997432	-0.702746
2940280	PCDHGB8	0.693991	1.00619	-0.675963	-1.02422
6940451	MYADM	0.842512	0.8577	-0.616478	-1.08373
650040	MYEF2	1.08034	0.620313	-0.881815	-0.818834
3460392	MPL	0.860641	0.840292	-1.08136	-0.619576
5720537	PHF6	1.07649	0.62453	-0.897352	-0.80367
3610154	SPINK2	0.818172	0.882896	-0.622199	-1.07887
1190091	MFSD3	1.07989	0.621195	-0.873947	-0.827141
5130612	SFRS2	0.971535	0.729568	-1.04674	-0.654367
6290181	KCNE1L	0.964769	0.736369	-1.05063	-0.650513
4290553	MASTL	0.807351	0.893912	-1.07642	-0.624847
2100348	OLFR1111	1.07725	0.624028	-0.812341	-0.888941
1940139	LAMC3	1.02261	0.678677	-0.698217	-1.00307
1450369	OSGEPL1	1.0462	0.655301	-0.970075	-0.731431
3990376	EEF1E1	1.05962	0.641929	-0.944324	-0.757224
2060725	UTS2D	0.62698	1.07457	-0.803061	-0.89849
6960367	SS18L1	0.833911	0.867666	-1.07889	-0.622684
2900064	OLFR547	0.919626	0.782061	-0.633129	-1.06856
10133	SPAG11	0.626823	1.07487	-0.894761	-0.806935
2750470	PCDHA9	0.773366	0.928491	-0.636859	-1.065
1660360	HNRNPK	1.07335	0.628841	-0.89444	-0.80775
5690093	SLC24A2	0.694311	1.00805	-1.01358	-0.688777
830170	GAS1	1.07601	0.626477	-0.835407	-0.867079
6370369	ZBED4	1.03603	0.666488	-0.980026	-0.722489
3780519	OLFR267	0.989932	0.712623	-0.673998	-1.02856
3840278	CBFA2T3H	0.714303	0.988279	-1.02974	-0.672844
5340646	IFNK	0.688204	1.01457	-1.00517	-0.697607
830201	1500032L24RIK	1.07343	0.629734	-0.871655	-0.831507
1470709	SDHB	0.66528	1.03808	-0.972227	-0.731136
2070563	POR	1.06217	0.641255	-0.781869	-0.921556
1690240	OLFR130	0.698861	1.00458	-0.691177	-1.01227
1300288	PPP1R1A	0.741784	0.961682	-1.04412	-0.659348
1450113	OLFR871	0.940132	0.763627	-1.0539	-0.649855
6400333	ACOXL	1.06302	0.640823	-0.914325	-0.78952
7570240	PLXNA4	0.865486	0.838564	-1.07094	-0.633106
2470161	UACA	0.962692	0.741391	-0.662814	-1.04127
2060719	UBAC2	0.650504	1.05371	-0.767331	-0.936881
4920685	MTPN	0.919968	0.784248	-1.06	-0.644214
2630470	9030025P20RIK	1.0399	0.66434	-0.964031	-0.740207
1300358	ZNRD1	1.06304	0.641365	-0.907485	-0.796916
1030753	C78339	0.721508	0.982926	-1.02648	-0.67795
2600408	SGCG	0.704315	1.00013	-1.01208	-0.692369
3390435	SLC35E1	0.752764	0.951783	-1.04556	-0.658991
5700747	MAN1C1	0.640296	1.06435	-0.806029	-0.898613
4830138	GAS7	0.996566	0.708096	-0.690283	-1.01438
4880019	KCTD9	0.642399	1.06232	-0.90614	-0.798574
4540079	PPP2R5D	0.799	0.906202	-1.06061	-0.64459
6060392	2310036O22RIK	0.901701	0.803535	-1.06161	-0.643631
7570326	F830045P16RIK	0.903969	0.801268	-0.644181	-1.06106
4060056	2310016E02RIK	0.705581	0.999815	-1.00816	-0.697239
290722	PTGS1	0.672449	1.03304	-0.967406	-0.738083
5810630	COX4NB	0.663341	1.04216	-0.753946	-0.951553
2140136	LOC100047934	0.850484	0.855206	-1.06569	-0.639998
2120397	CCR5	1.01502	0.69075	-0.990301	-0.715471
830369	CYBA	0.916672	0.789159	-1.05541	-0.65042
3450327	ATXN3	0.987623	0.718558	-1.01549	-0.690689
5820017	DNTTIP2	0.651292	1.05509	-0.795194	-0.911189
4540379	DPYSL3	0.644795	1.06161	-0.827543	-0.878862
4610398	PSG16	0.647801	1.05872	-0.812289	-0.894232
620373	OLFR1145	1.03578	0.670792	-0.95573	-0.750847
7100632	LOC100048483	0.651255	1.05537	-0.799491	-0.90713
1230341	BHLHB2	1.0485	0.658162	-0.927883	-0.778781
10184	PPME1	0.694437	1.0123	-0.718184	-0.988548
450678	TAF12	1.06127	0.645519	-0.838155	-0.86863
620471	HPN	0.734501	0.972296	-0.682266	-1.02453
4280341	BC066028	0.851385	0.855481	-0.645345	-1.06152
830204	HNRNPC	0.852528	0.854389	-1.06134	-0.645573
7560162	RAD21	0.750143	0.956872	-1.03341	-0.673601
360689	TUBB5	0.718798	0.988258	-1.0111	-0.695956
1450121	ITGA9	1.05885	0.648277	-0.88029	-0.826838
2690152	PASK	1.0188	0.688464	-0.729736	-0.977525
430451	MMRN2	1.00399	0.703392	-0.994546	-0.712832
360301	CCT6A	0.66548	1.04194	-0.770526	-0.936898
3140709	LOC669251	1.05086	0.656604	-0.912284	-0.795177
7150326	KRT5	1.04044	0.667029	-0.939819	-0.767653
940121	BMP3	0.653519	1.05405	-0.898577	-0.808987
4570451	CDKN1C	0.673373	1.03429	-0.95068	-0.756982
5870097	ID4	0.900259	0.807449	-0.654572	-1.05314
130411	OLFR803	0.656889	1.05085	-0.908784	-0.798953
6330114	KIF15	1.05463	0.653158	-0.891875	-0.815909
6650148	TIAL1	0.852078	0.855788	-1.05788	-0.649985
3610463	CCDC66	0.923948	0.784252	-0.663975	-1.04422
2360156	TTC22	0.720661	0.987539	-0.701719	-1.00648
3710170	C1QC	0.976759	0.731447	-1.01526	-0.692944
780475	PRC1	0.976217	0.732106	-1.01515	-0.693168
1580021	RPL29	0.839543	0.868866	-0.653071	-1.05534
1070309	SAPS1	0.697065	1.01155	-0.979184	-0.72943
6960095	OGT	0.773581	0.935089	-0.670754	-1.03792
3890113	BCKDK	0.654133	1.0546	-0.849676	-0.859057
510474	LGALS3	0.946119	0.762702	-0.676772	-1.03205
2760047	CCL3	1.05365	0.655302	-0.862489	-0.846466
3360343	PDE1B	1.02721	0.68183	-0.953374	-0.755665
5810504	RASAL1	0.656468	1.05273	-0.846496	-0.862702
5290376	FOXA3	0.831483	0.877762	-0.657888	-1.05136
1690673	OLFR1446	0.755101	0.954153	-1.02586	-0.683396
3400368	HOXC9	0.674382	1.03502	-0.774318	-0.935082
4890553	INVS	0.851399	0.858076	-1.05181	-0.657669
4120356	GP49A	1.0513	0.658289	-0.848395	-0.861193
2940255	ANKMY1	1.0168	0.692903	-0.96541	-0.744298
840209	6330406I15RIK	0.666959	1.04286	-0.909007	-0.800816
160204	2410018L13RIK	0.736376	0.973489	-1.01025	-0.699612
5960719	UBE2G1	0.801961	0.90795	-0.667088	-1.04282
6200433	CLCN7	0.793934	0.916071	-1.03997	-0.670039
2140639	CTSE	0.814409	0.896255	-1.04278	-0.66788
3060021	MTUS1	0.971542	0.73917	-0.702937	-1.00778
3450255	UXS1	1.00388	0.706864	-0.734456	-0.976289
1340754	EGFL8	0.957641	0.753337	-0.694735	-1.01624
1300327	CAPZB	0.858046	0.852959	-1.04583	-0.665176
1470685	OLFR319	0.771017	0.94004	-1.02582	-0.685235
1980112	WNT8A	0.670828	1.04039	-0.814062	-0.897154
6180427	DAPK2	0.745917	0.965303	-0.701238	-1.00998
4290368	ACSL4	0.676644	1.03479	-0.797132	-0.914301
3190500	SIAT7F	0.667539	1.04393	-0.85229	-0.859183
1170273	CKS1B	0.709373	1.00212	-0.737534	-0.973957
6180424	KCNE1	0.710971	1.00062	-0.975199	-0.736391
5090731	BAG1	1.04148	0.670128	-0.828953	-0.882657
580577	SNAP25	1.02846	0.68317	-0.928948	-0.782685
7160129	STK24	0.933856	0.777816	-0.68554	-1.02613
2970632	ARTN	0.932811	0.778901	-0.685272	-1.02644
430670	FOXA1	1.03956	0.672181	-0.890984	-0.820755
4260687	DAP	0.71688	0.994863	-0.980969	-0.730774
3520070	SNAPC3	1.0227	0.689096	-0.771953	-0.939847
6220424	PSG28	0.679244	1.03269	-0.797562	-0.914371
4280468	UNC5CL	1.03047	0.681646	-0.918652	-0.793459
1740441	NCOA4	1.01567	0.696455	-0.76202	-0.950102
4610129	HIST1H2AN	0.977488	0.73473	-0.716748	-0.99547
5290333	ME2	0.871649	0.840627	-1.04002	-0.672253
4730026	CPSF1	0.760488	0.952215	-1.0117	-0.701002
650376	PLA2G12B	1.03449	0.678336	-0.893888	-0.818937
5820056	SERPINB6B	0.917643	0.795285	-1.02734	-0.685591
6940356	LASS6	1.0346	0.678371	-0.89025	-0.822721
3840201	CHRNA1	0.740754	0.972486	-0.718852	-0.994388
5290132	MAN1A2	0.902116	0.811227	-0.683001	-1.03034
5090500	RNF11	0.902177	0.811178	-0.683074	-1.03028
1710592	RAB38	0.909358	0.804067	-0.685493	-1.02793
1070709	NEDD9	0.79075	0.922739	-1.02294	-0.690547
5390347	OLFR153	0.966452	0.747449	-0.995807	-0.718094
2450021	SLC29A2	0.868276	0.845774	-1.03278	-0.681271
430333	NCAPG2	1.0187	0.69551	-0.925165	-0.789043
5670373	CYHR1	1.02763	0.686647	-0.896619	-0.817658
4070176	MYT1L	0.894582	0.819697	-1.02808	-0.6862
3140768	IDI1	0.688333	1.02608	-0.900432	-0.813985
3450600	PLK4	0.683498	1.03101	-0.850307	-0.864197
4850382	SFRS3	0.838768	0.875824	-1.02976	-0.684835
6370553	LAT2	0.941403	0.773261	-1.00865	-0.706018
3180719	LMO3	0.99833	0.716346	-0.757025	-0.957652
2140653	ADAM32	1.00938	0.705453	-0.938524	-0.77631
1400242	TRPM5	1.00641	0.708441	-0.943751	-0.771097
2000575	PLAGL1	0.985023	0.730128	-0.744057	-0.971093
6220253	MRPL51	0.827898	0.887342	-1.02523	-0.690012
6110170	TPI1	1.02546	0.689883	-0.883075	-0.832268
3800132	VWA3A	0.711349	1.00402	-0.943393	-0.771973
1570474	DAZL	1.01782	0.697633	-0.91232	-0.803134
1690768	CCL5	1.02194	0.693551	-0.817896	-0.897594
5860609	NCALD	1.02041	0.695162	-0.902077	-0.813494
5050603	ALDH9A1	1.02616	0.68945	-0.8601	-0.855506
510669	CYP4F13	0.837047	0.878685	-1.02429	-0.69144
6130064	CEND1	0.708718	1.00706	-0.934079	-0.781696
5820762	TACC2	0.967872	0.747932	-0.984058	-0.731746
5220192	1810057B09RIK	0.882537	0.833339	-1.0231	-0.692772
2650372	TCEA3	0.696282	1.01966	-0.898259	-0.817686
1230767	THBD	0.980211	0.735785	-0.97088	-0.745117
4390020	CAPN2	0.852972	0.863039	-1.02422	-0.691791
1440451	RAB19	0.996288	0.720086	-0.768977	-0.947397
1570646	OLFR1349	0.908751	0.807649	-1.0145	-0.701897
7040088	TAF12	0.970617	0.745807	-0.977834	-0.73859
1340241	ABCE1	0.703829	1.01263	-0.913387	-0.803074
510167	PIGN	0.788448	0.928136	-0.710671	-1.00591
7200292	DSG2	0.698188	1.01845	-0.888925	-0.827712
1980192	MRPL33	0.96684	0.749807	-0.979921	-0.736726
1190131	BCAR3	0.705261	1.01152	-0.804613	-0.912163
4760079	RPS6KA5	0.878132	0.838712	-1.01916	-0.697686
1780626	FXN	0.697886	1.01904	-0.875567	-0.841362
6290427	PDXP	0.885896	0.831067	-1.01744	-0.699524
1260605	HIST1H2BN	0.9228	0.794193	-1.00625	-0.710741
2260692	ANTXR1	0.807346	0.9097	-1.01102	-0.706021
830678	SERPINB9B	0.914078	0.803042	-0.708007	-1.00911
6620017	PTGDS2	0.701351	1.01594	-0.885441	-0.831848
7000747	FES	0.707897	1.00952	-0.908615	-0.808805
4290360	MOSPD3	0.942018	0.775423	-0.723591	-0.993849
50133	6530404N21RIK	0.840523	0.876982	-1.01609	-0.701412
4050112	GLRX	0.826506	0.891103	-1.0133	-0.704312
4250500	GCNT2	1.00496	0.71267	-0.918113	-0.799516
1400161	OLFR1362	0.857444	0.860321	-0.701914	-1.01585
3130209	NME7	0.750126	0.967787	-0.970954	-0.746959
5420053	OSGIN2	0.929132	0.788799	-0.998365	-0.719566
5220736	MYG1	0.982486	0.735777	-0.766562	-0.951702
5220228	ARMCX6	0.713919	1.00439	-0.808063	-0.910248
3290707	TNFSF10	0.719598	0.998918	-0.797233	-0.921283
3130021	MRPS25	0.803877	0.914743	-1.00108	-0.717535
1780307	CCL25	0.994741	0.72395	-0.790649	-0.928041
6370341	EBAG9	1.00999	0.708853	-0.848667	-0.870178
7570619	PLXDC1	0.906633	0.812384	-0.717138	-1.00188
1500753	LOC100047473	0.727594	0.991477	-0.930165	-0.788907
5900438	LOC100044179	0.858451	0.860653	-0.710089	-1.00901
1940128	RBM42	0.974141	0.745191	-0.953704	-0.765628
6280477	IFNG	0.830302	0.889091	-1.00454	-0.71485
6620079	EGR1	0.831821	0.88776	-0.715784	-1.0038
4730630	TTL	0.904615	0.814989	-0.720262	-0.999343
7510326	5830415L20RIK	0.994875	0.724752	-0.916388	-0.803238
1010521	GMCL1	0.99855	0.721306	-0.902732	-0.817124
6250433	ACTR3	0.943742	0.776184	-0.977898	-0.742028
360133	GJA5	0.772578	0.947392	-0.974931	-0.745039
3840541	TIMM13	0.909702	0.810687	-0.993164	-0.727224
1440747	RNF113A2	0.779541	0.940864	-0.743596	-0.976809
60603	HAVCR2	0.729398	0.991096	-0.913437	-0.807057
450253	MRPL9	0.771927	0.948706	-0.751231	-0.969401
6100735	LMNB2	0.867548	0.853214	-0.720962	-0.9998
510435	ZCCHC3	0.970879	0.750026	-0.944406	-0.776499
580673	CADM3	0.90281	0.81823	-0.729286	-0.991754
130445	NFS1	0.737131	0.983929	-0.921756	-0.799304
5910753	SLU7	0.764154	0.956961	-0.958481	-0.762634
6900307	PRICKLE2	0.963585	0.757604	-0.77033	-0.950859
6040619	1200009F10RIK	0.806738	0.914498	-0.986194	-0.735043
7320468	LPIN1	0.76875	0.952503	-0.759617	-0.961636
5700088	KLF17	0.751749	0.969601	-0.779354	-0.941996
4480112	PREP	0.810311	0.911066	-0.986755	-0.734622
1660424	PSD4	0.909597	0.812029	-0.985797	-0.735829
1780524	TFRC	0.752362	0.969439	-0.937844	-0.783957
2630315	WNT3A	0.829892	0.891921	-0.990207	-0.731606
4060228	ADRA2B	0.992132	0.729746	-0.842053	-0.879825
520082	GHSR	0.792943	0.92905	-0.973863	-0.748129
1110475	CML2	0.799591	0.92257	-0.745759	-0.976402
2630142	NRAS	0.935475	0.786711	-0.753838	-0.968349
670500	FIGNL1	0.884575	0.837708	-0.733386	-0.988897
7650242	IL18R1	0.913402	0.808892	-0.979977	-0.742317
2350468	FERD3L	0.792218	0.930175	-0.752	-0.970392
7570403	E430028B21RIK	0.955958	0.766508	-0.948308	-0.774159
4040435	CHCHD10	0.870404	0.852244	-0.734203	-0.988445
6840438	CUTC	0.757874	0.96489	-0.934376	-0.788388
3850754	BRWD1	0.914966	0.807962	-0.747894	-0.975034
1110154	MYF5	0.738411	0.984542	-0.885374	-0.837579
2060687	B230217C12RIK	0.98561	0.737532	-0.863765	-0.859377
6980593	1700030K09RIK	0.804341	0.918869	-0.752084	-0.971126
2510561	MYL4	0.871304	0.852015	-0.739211	-0.984108
6180288	LOC100048046	0.77174	0.951732	-0.94373	-0.779742
4040035	NKG7	0.823151	0.900485	-0.976031	-0.747605
3130349	HEPH	0.741996	0.981656	-0.849442	-0.874209
1240594	UBR7	0.863719	0.860062	-0.981416	-0.742365
5700168	VAMP3	0.956324	0.767595	-0.933704	-0.790215
2320647	ABHD8	0.972822	0.75111	-0.903683	-0.820248
5810632	OLFR11	0.76918	0.954759	-0.935504	-0.788435
6620500	OLFR566	0.898452	0.825555	-0.974126	-0.749881
1940543	NPNT	0.752614	0.971443	-0.819121	-0.904936
2360138	ING3	0.753326	0.970868	-0.820315	-0.90388
6510661	A530082C11RIK	0.861028	0.863295	-0.977721	-0.746602
1030368	CTSC	0.917524	0.807073	-0.961462	-0.763135
5310722	1200015F23RIK	0.850295	0.874316	-0.975063	-0.749547
4280370	TDPOZ1	0.845521	0.879131	-0.974153	-0.750499
1190678	PHC1	0.972734	0.751949	-0.838958	-0.885726
2690392	MAPK12	0.818394	0.906412	-0.965287	-0.75952
6980020	ZMAT2	0.817185	0.907799	-0.963304	-0.76168
620725	1810010M01RIK	0.802368	0.922642	-0.954989	-0.770021
630767	DCPP3	0.863246	0.86177	-0.972784	-0.752231
650402	HOXA1	0.946761	0.778258	-0.933623	-0.791395
2320487	ELMOD2	0.758164	0.967029	-0.831803	-0.89339
1230730	0610007P14RIK	0.806394	0.918964	-0.954346	-0.771012
130735	ARSB	0.969167	0.756297	-0.855071	-0.870393
1990112	EBP	0.96251	0.763084	-0.89772	-0.827874
450743	GPR153	0.760799	0.964992	-0.882886	-0.842904
780750	HIC1	0.899999	0.825886	-0.959315	-0.766569
6180195	GDAP1L1	0.9523	0.773841	-0.815563	-0.910577
3870707	CAR5B	0.814045	0.91224	-0.776192	-0.950092
6220097	IMPG2	0.830325	0.895979	-0.769027	-0.957277
2600142	ACAD8	0.77746	0.948935	-0.912488	-0.813907
2370255	RMI1	0.953135	0.773326	-0.903014	-0.823447
5420224	TFDP1	0.770936	0.955548	-0.896499	-0.829985
1850446	PIK3R3	0.959508	0.766977	-0.844344	-0.882142
3990484	3110004L20RIK	0.819152	0.907343	-0.775709	-0.950786
60630	4921517D21RIK	0.902359	0.824301	-0.775017	-0.951643
130524	ZFP318	0.863836	0.862848	-0.959686	-0.766997
940168	OGDH	0.857809	0.869085	-0.957709	-0.769186
3310438	GNPTAB	0.793144	0.93378	-0.92609	-0.800834
2600630	CKMT2	0.952434	0.774534	-0.893122	-0.833846
1400112	TCFAP2B	0.894255	0.832773	-0.775525	-0.951503
1440767	E130308A19RIK	0.907543	0.819525	-0.945278	-0.781789
2190164	CCNB1	0.861251	0.865845	-0.956097	-0.770998
6330358	PLA1A	0.924905	0.802557	-0.798964	-0.928498
6040692	PPHLN1	0.871536	0.855985	-0.775586	-0.951936
1690092	FGF4	0.863779	0.86383	-0.951452	-0.776158
6980162	DCUN1D5	0.790273	0.937399	-0.910352	-0.81732
60138	IMPA1	0.886354	0.8414	-0.78064	-0.947114
510564	KRTCAP2	0.895558	0.832271	-0.943293	-0.784537
4260184	ABHD7	0.903283	0.824635	-0.789102	-0.938816
4490470	DBI	0.947464	0.780522	-0.87207	-0.855916
3440021	CSF1	0.802209	0.925874	-0.919189	-0.808894
7000026	POLR2E	0.928735	0.799623	-0.911315	-0.817043
4880360	LMNA	0.81103	0.917574	-0.920221	-0.808383
5570541	3300001P08RIK	0.803274	0.925437	-0.819109	-0.909603
6220088	ZFP212	0.93322	0.795668	-0.891704	-0.837184
240450	HIST2H2AC	0.912469	0.816549	-0.918808	-0.81021
3400343	PARD3	0.820204	0.909072	-0.811464	-0.917812
4010187	CPLX3	0.796098	0.933188	-0.855415	-0.873871
520360	OLFR532	0.894092	0.835257	-0.926415	-0.802933
4810338	HNRPA1	0.842974	0.886399	-0.9292	-0.800174
1740494	THNSL1	0.841772	0.887659	-0.801417	-0.928015
2060561	NPM3	0.809855	0.919729	-0.900169	-0.829415
7040201	THY1	0.827182	0.902601	-0.814857	-0.914926
1580152	UGDH	0.913358	0.816713	-0.83198	-0.898091
2260551	COL4A2	0.86018	0.869926	-0.807241	-0.922865
4040228	SLC16A3	0.864365	0.865856	-0.921394	-0.808826
1580286	CYP39A1	0.823758	0.906536	-0.90159	-0.828704
6280209	HSPB8	0.868565	0.862005	-0.915806	-0.814764
1500341	THAP4	0.9124	0.818271	-0.878521	-0.85215
3290368	SNAPC5	0.823686	0.907113	-0.84471	-0.886088
5860132	ADRA2B	0.827018	0.903831	-0.840813	-0.890036
4830048	FABP5	0.907073	0.823865	-0.851448	-0.879489
2350746	RAB39B	0.830439	0.900653	-0.886238	-0.844854
730612	OPLAH	0.905382	0.825749	-0.868187	-0.862945
990162	TLX2	0.903313	0.827881	-0.873334	-0.85786
110338	RAD50	0.865612	0.865655	-0.828774	-0.902492
4540129	SEC61G	0.899233	0.832088	-0.853955	-0.877366
650646	RPGR	0.870121	0.861231	-0.900182	-0.83117
620468	CBLL1	0.869838	0.861687	-0.835883	-0.895642
7320504	AIFM2	0.840827	0.890788	-0.877246	-0.854369
2510494	LOC235243	0.842605	0.889133	-0.866633	-0.865105
6940102	4921537P18RIK	0.848758	0.883055	-0.855085	-0.876729
1170139	SPP1	0.856192	0.875695	-0.852247	-0.87964
1260767	LOC627199	0.864454	0.867457	-0.881473	-0.850437
3400307	TLK1	0.867236	0.864741	-0.854738	-0.877238
